# Supplementary material for: Dendritic cell therapy augments antitumor immunity triggered by CDK4/6 inhibition and immune checkpoint blockade by unleashing systemic CD4 T-cell responses
Source: HighWire-hosted journal article supplement (doi:10.1136/jitc-2022-006019), 2023-05-01
Supplement: jitc-2022-006019supp001_data_supplement.xlsx [file jitc-2022-006019supp001_data_supplement.xlsx]

## Sheet: immuneCD45
NAME	Description	Vehicle-1	Vehicle-2	Vehicle-3	Palbo-1	Palbo-2	Palbo-3
XP_006532407	Cog1	0.0146869	0	0	32.7356	34.2591	33.4825
XP_006532408	Cog1	0.0146869	0	0	32.7356	34.2591	33.4825
XP_006515913	Rps6kl1	0	0	0	15.7036	16.7079	15.3542
NP_001032243	Gm4925	1	1	1	7	8	8
XP_017172290	Dnajc21	21.3296	18.7299	22.3313	0	0	0
XP_006510928	Pstpip1	14.2388	16.7548	16.683	0	0	0
NP_001157523	Pik3cd	0.000247343	0	0.0454106	29.3489	33.8003	28.6965
XP_006521448	Slc25a32	0	0	0	8.97977	7.94364	9.70179
XP_006513778	Tmtc2	0	0	0.092782	29.0843	23.6997	25.5061
XP_006528746	Shroom2	0	0	0	19.9934	24.0202	24.9667
NP_941054	Hjurp	350.953	376.049	367.064	204.8	205.512	177.081
XP_006499017	Mapk8ip1	40.2001	40.1369	45.262	7.55223	3.93868	0
XP_006496291	Uxs1	0	0	2.14e-07	23.4021	18.27	22.2439
XP_006527072	Pprc1	207.626	169.151	166.611	5.66348	0.00493432	0.237506
NP_075606	Cdc25b	101.711	98.087	95.9477	30.043	23.8402	40.3945
NP_001034645	Rad54b	72.6298	81.2779	73.901	24.9845	24.9993	34.339
XP_017176701	Tmem156	35.7557	34.7882	34.522	16.2652	20.2138	20.573
XP_006496730	Hsd17b7	14.7098	16.4249	19.9419	0	0	0
NP_001153440	Ralgps2	0	0	0	12.4848	12.1009	9.20124
XP_011245962	Fam3a	5.26677	7.39921	6.79569	0	0	0
NP_033921	Aspm	471.084	514.418	566.059	100.565	90.0388	176.702
XP_006533217	Top2a	415.375	367.28	422.787	144.372	80.6619	144.127
XP_006533218	Top2a	415.375	367.28	422.787	144.372	80.6619	144.127
NP_705617	Tef	26.6499	22.4624	22.8393	5.29458	0.0861379	0
NP_758505	Ccnb1	329	291	327	72	82	133
XP_011248910	Proser3	0	0	0	19.0031	18.1957	13.2374
XP_017177809	Proser3	0	0	0	19.0031	18.1957	13.2374
XP_006504811	Iqce	0	1.55583	0	26.1198	18.4716	20.8625
NP_082160	Tns1	148.581	111.224	120.37	21.2811	0	0
XP_006517415	Fam172a	64.8584	77.1971	73.9816	29.8232	35.521	25.8291
XP_006506071	Ppp4r2	34.5563	34.5911	34.4959	43.1545	43.7939	46.7882
NP_001274108	Kif14	126.5	125.5	132.844	28	31	58.5
XP_006529792	Kif14	126.5	125.5	132.844	28	31	58.5
XP_017175744	Fsd1l	0	0	0	9.82193	11.2021	7.53295
XP_011249310	Ocrl	0	0	0	22.382	32.506	31.8965
XP_006536233	Mtg1	11.9001	17.7533	14.9215	0	0	0
NP_659131	Spats2l	4.37829	3.46248	5.08667	0	0.0105428	0.310846
XP_006496273	Spats2l	4.37829	3.46248	5.08667	0	0.0105428	0.310846
XP_006496274	Spats2l	4.37829	3.46248	5.08667	0	0.0105428	0.310846
XP_006496275	Spats2l	4.37829	3.46248	5.08667	0	0.0105428	0.310846
NP_032855	Pgr	1	3	0	16	12	15
XP_006498368	Dab2ip	19.0039	28.5438	24.0874	0	0	0
NP_663584	Msantd4	65.5	64.5	64	83	81	77
XP_006509954	Msantd4	65.5	64.5	64	83	81	77
NP_001293147	Trappc6b	76.4635	82.158	84.375	173.186	146.949	148.998
NP_776123	Cenpe	626.686	714	721.789	170	147	298
NP_083525	Parpbp	51	67.1302	57.3483	0	9.96125	12.2514
NP_034435	Gnai1	1	1	0	5	5	4
XP_006526430	Sil1	0	5.81402	16.631	66.3257	53.8518	57.3039
NP_001106824	Synj2	523.712	489.194	482.705	611.198	614.431	632.945
NP_032116	Gata2	6	3.5	3	14	12.5	12.5
XP_006505602	Gata2	6	3.5	3	14	12.5	12.5
XP_006526771	Incenp	574.39	659.999	678.79	290.741	268.046	348.894
XP_006501394	Gatb	13.5295	16.3595	11.9774	26.4447	26.7965	29.6659
NP_001025026	Psme2	22.9757	21.5696	20.7435	3.40422	6.4632	9.38444
NP_032047	Foxm1	317	305	326	87	77	155
XP_006503188	Clspn	13.6802	20.9604	18.2333	0	0	0
NP_848798	Depdc1b	39.8958	48.7326	39.3116	16	16	18.2049
NP_663597	Zfp65	38.3347	35	43	66	65.4486	59.9017
XP_006518887	Wapl	203.177	252.672	273.688	73.224	39.1066	49.6144
NP_775552	Rbmx2	45	47	54	27	24	25
NP_001165563	Depdc1a	41.0839	52.8153	46.9176	7.58224	7.95882	16.6535
NP_001034088	Atp8a1	354.297	306.773	398.417	103.381	121.041	142.246
NP_062645	Net1	51.7252	39.043	50.1919	13.4798	12.4413	15.8253
XP_006538839	Eif4g3	70.5899	45.7912	37.3521	194.672	155.156	192.856
NP_001075119	Rgs3	24.4021	24.7327	26.6331	12.9433	10.5467	15.3864
NP_001074832	Cenpf	635	603	760	134	91	240
XP_011242579	E2f3	47.367	51.2544	53.6136	83.4186	75.8846	88.6036
XP_006526677	Btrc	8.87381	10.7286	6.78939	0	0	0
XP_006507075	Etnk1	60.4485	77.2747	69.3333	32.4175	30.7459	29.1974
XP_006504678	Ppp1r35	32.4476	38.1738	36.8145	20.6659	22.0523	18.5679
XP_006525592	Apc	130.659	183.023	166.506	36.8269	14.541	1.61228
NP_059103	Spag5	374.84	414.449	473.489	130.254	117.074	188.904
NP_666283	Ncapd2	506.14	490.447	570.294	177.319	138.315	261.913
XP_006506594	Ncapd2	506.14	490.447	570.294	177.319	138.315	261.913
XP_017173674	Ablim1	115.202	121.807	97.6391	53.5391	48.589	58.2605
NP_001157056	Prom1	0	0	3.41e-06	5.00884	6.22117	3.88609
XP_006503852	Prom1	0	0	3.41e-06	5.00884	6.22117	3.88609
XP_006503853	Prom1	0	0	3.41e-06	5.00884	6.22117	3.88609
NP_038587	Hsph1	1261.17	1307.16	1305.51	928.367	750.04	903.036
XP_006541103	Pnkp	0	0.00162029	4.42393	42.032	50.0494	64.7231
XP_006523616	Ccnd3	44.1749	50.3763	58.2946	100.733	87.0202	92.5902
XP_006529214	Inpp5d	98.5855	103.748	105.861	3.89219	23.2529	40.6638
NP_001299847	Ephx1	0	8.14317	8.686	25.6473	27.4089	28.4878
XP_006517838	Gpbp1	33.2489	26.01	20.64	0	0	0
XP_011238270	Plk4	74.6035	99.1475	75.6449	24.0229	12.6787	22.0936
XP_006513709	Apc2	41.9999	52.9999	61.9995	10.6613	2.1393	0
NP_001074506	Srgap1	0	0	6.44713	68.0744	62	43.418
NP_001155269	Phactr4	62.3271	58.271	68.655	27.3377	35.9512	35.931
XP_006532131	Brca1	58.1719	68.6192	75.1013	22.8409	27.4655	31.8806
XP_011240168	Stx1b	5	3.57668	3	9	8	9
XP_006515954	Mok	12.1174	19.5802	19.0245	0	0	0.011407
NP_081295	Odf3	5	6	3	16	13	13
XP_006540228	Lrp3	4	5	3	0	0	0
NP_758495	Foxred1	4.47e-08	0.772445	0	43.4238	35.1422	26.121
XP_006497890	Surf2	16.0829	14.9954	14.9592	10.5957	7.76015	8.46904
XP_006510530	Prdm10	109.043	122.529	113.655	143.277	145.092	141.399
NP_034609	Hspa1a	2904.7	2547.08	2954.62	1731.47	1247.86	1529.29
XP_011237379	Sh3glb2	28.4093	20.597	22.5892	8.03794	7.32987	5.15713
NP_033902	Bub1	210.12	229.17	276.31	74.3479	38.4671	91.2723
NP_057892	Zkscan5	117	119.043	120	30.5499	65.7519	35.8583
XP_006529171	Aspm	43.0498	53.3001	57.8847	15.6238	8.07288	19.1748
NP_444321	Cox4i2	19	26	22	38	45	43.5
XP_017174836	Cox4i2	19	26	22	38	45	43.5
NP_033990	Cdc25c	54.4855	62	76	9.92971	9.97275	21.8869
NP_001037849	Timp1	8.0994	6.97295	4.94122	30.4514	30.8301	21.7078
NP_035723	Timp1	8.0994	6.97295	4.94122	30.4514	30.8301	21.7078
XP_017168476	Sec16b	12.3221	8.17792	7.98824	0	0	0.00338469
XP_006515883	Yy1	91.5305	106.562	91.5499	56.1289	41.7986	55.0162
NP_932127	Ankrd17	359.623	250.435	305.484	978.581	730.815	980.493
NP_001263692	Brsk2	10.7495	7.34848	9.62173	33.2191	35.6865	25.1854
NP_001300694	Shroom4	40.2412	54.5419	32.647	0	0	0
XP_006520213	Mtdh	120.306	87.3284	104.692	42.6691	27.6096	25.8191
XP_006497686	Acvr2a	39.1304	45.1177	54.0662	0	11.8879	11.738
NP_061342	Ift20	128	130	122	168	152	162
XP_011242997	Slc30a5	76.5889	102.558	96.9873	30.1732	0	0
NP_034114	Ctsl	1055.5	954	834	1709	1895	1541.5
XP_006517143	Ctsl	1055.5	954	834	1709	1895	1541.5
NP_796023	Jph4	5	4	5	1	2	2
XP_011237049	Cd84	108.806	105.172	115.05	81.4153	72.6316	63.7669
XP_006527104	Ablim1	11.3112	19.8424	17.9343	0	0	0
XP_017168146	Tfdp1	36.9396	26.8943	29.2507	8.36722	12.3295	11.0981
XP_017168147	Tfdp1	36.9396	26.8943	29.2507	8.36722	12.3295	11.0981
XP_017168148	Tfdp1	36.9396	26.8943	29.2507	8.36722	12.3295	11.0981
XP_006526705	Mark2	144.177	130.647	134.534	90.4301	98.5258	76.2567
XP_006522188	Ccdc14	0	1.49476	8.57e-06	12.0052	10.9283	7.24472
XP_011244193	Ccdc14	0	1.49476	8.57e-06	12.0052	10.9283	7.24472
NP_082251	Fam83d	99	96	81	35.3959	14.202	41
XP_006496620	Mff	6.85695	15.973	2.73e-06	36.0345	45.5214	43.6714
ds_NP_035022	Nek2	77.6553	64.7549	67.6307	19.5	14.4048	35.6404
NP_035022	Nek2	77.6553	64.7549	67.6307	19.5	14.4048	35.6404
NP_766344	Ankle1	66.2919	76	62.583	27.32	0	11.3686
XP_006538549	Prdm2	0.199828	0.00731348	0.825213	12.2365	7.09466	9.70187
NP_780583	Mtrf1l	78	83	85	61	61	51
NP_001273528	Clasp2	107.633	137.36	149.462	53.9762	40.2821	26.181
NP_666251	Vav3	10.4317	6.80652	18.8809	34.0323	36.6713	33.7958
XP_011242810	Zcchc6	153.623	176.085	172.014	119.601	125.183	112.32
XP_011242811	Zcchc6	153.623	176.085	172.014	119.601	125.183	112.32
XP_011242812	Zcchc6	153.623	176.085	172.014	119.601	125.183	112.32
XP_006515580	Mark3	17.8282	12.7002	22.6461	0.628732	7.24e-06	4.24e-08
NP_705729	AF529169	190.667	145	226.667	47	14.3333	37.6667
XP_006511020	AF529169	190.667	145	226.667	47	14.3333	37.6667
XP_017168754	AF529169	190.667	145	226.667	47	14.3333	37.6667
NP_742048	Tmcc3	174.013	172.737	191.036	137.406	114.41	117.437
XP_011236690	Stau2	21.5467	32.0349	29.2407	7.07553	9.88053	6.7987
XP_011248472	Gpr153	7.47611	0	0	18.0496	24.5407	24.8878
NP_035649	Sdc1	198.442	198.045	101.125	346.434	383	377.928
NP_032908	Plxna2	264	226.353	259.401	131.488	82.922	144
XP_006541530	Enox2	0.0298365	6.71682	0.00418233	24.3333	31.7802	39.9877
NP_034153	Eci1	206	180	211	277	270	255
NP_001238985	Ly6c1	0	0	0	3.11957	5.25939	3.41676
XP_006511517	Kif23	178.62	185.462	245.183	70.649	29.3665	68.4423
NP_001171096	Ect2	139	140.911	174.075	51.6438	48.5165	81.5212
NP_001171097	Ect2	139	140.911	174.075	51.6438	48.5165	81.5212
NP_062311	Ncapg	227.391	283.137	312.878	110.063	108.39	137
NP_001159878	Kif20a	125.333	103.333	132.333	51.6667	41.3333	67
NP_001159879	Kif20a	125.333	103.333	132.333	51.6667	41.3333	67
NP_033030	Kif20a	125.333	103.333	132.333	51.6667	41.3333	67
NP_082036	Rassf8	23.5	19.75	19	33.25	29.75	34.75
XP_011239900	Rassf8	23.5	19.75	19	33.25	29.75	34.75
XP_011239901	Rassf8	23.5	19.75	19	33.25	29.75	34.75
XP_011239902	Rassf8	23.5	19.75	19	33.25	29.75	34.75
NP_058624	Tlr5	15.5556	19.1111	15.2222	34.2222	27.6667	29
XP_017177186	Tlr5	15.5556	19.1111	15.2222	34.2222	27.6667	29
XP_017177187	Tlr5	15.5556	19.1111	15.2222	34.2222	27.6667	29
XP_017177188	Tlr5	15.5556	19.1111	15.2222	34.2222	27.6667	29
XP_017177189	Tlr5	15.5556	19.1111	15.2222	34.2222	27.6667	29
XP_017177190	Tlr5	15.5556	19.1111	15.2222	34.2222	27.6667	29
XP_017177191	Tlr5	15.5556	19.1111	15.2222	34.2222	27.6667	29
XP_017177192	Tlr5	15.5556	19.1111	15.2222	34.2222	27.6667	29
XP_017177193	Tlr5	15.5556	19.1111	15.2222	34.2222	27.6667	29
XP_006511897	Usp19	651.738	859.018	751.461	407.051	314.337	259.717
XP_017169514	Hnrnph3	62.2783	67.4596	43.2527	17.508	12.4489	12.2654
XP_006540919	Prc1	231.612	179.166	288.468	22.135	42.0195	59.6319
NP_080686	Cdca5	90	83	96	23	36	52
XP_006504858	Trrap	86.8392	197.535	90.6389	327.044	346.301	382.894
XP_006507242	Ints4	153.524	160.455	120.729	43.7674	74.1137	59.1253
XP_006522914	Hlcs	12.684	0	0	43.9465	35.4676	55.5069
NP_001277721	Wdr45	23.8404	23.4279	17.6421	37.4326	35.2777	32.8923
NP_001277723	Wdr45	23.8404	23.4279	17.6421	37.4326	35.2777	32.8923
NP_758960	Wdr45	23.8404	23.4279	17.6421	37.4326	35.2777	32.8923
XP_006527719	Wdr45	23.8404	23.4279	17.6421	37.4326	35.2777	32.8923
NP_001013395	Arhgef39	64.4724	50.4753	62.6322	19.6669	12.9437	30.5
XP_006537893	Arhgef39	64.4724	50.4753	62.6322	19.6669	12.9437	30.5
XP_011237680	Phf21a	25.2602	40.7038	24.8766	2.25e-05	1.81269	0
XP_006534213	Dnah17	3.06e-05	0.106885	0.000228261	86.1621	164.466	133.477
NP_543125	Nek8	99.81	121.126	99.1353	58.0623	60.1289	40.2021
XP_011248403	Ttc39b	62.5105	69.6515	51.4679	20.9319	17.2877	31.4491
XP_011244045	Fam118a	21.9951	16.1709	23.0472	6.21544	5.81181	0
XP_011241382	Ipcef1	36.4784	38.0953	24.7352	8.3277	10.9017	8.34894
XP_017169456	Ipcef1	36.4784	38.0953	24.7352	8.3277	10.9017	8.34894
XP_006535702	Nos3	21	11	19	0	2.03e-08	0
XP_006498877	Kif16b	255.808	298.97	296.38	125.273	180.029	174.086
NP_001177286	Carkd	138.937	139.214	110.833	221.257	187.981	220.08
NP_032631	Mmp12	2433	2895	3953	5427	5857	5872
XP_006515844	Rapgef5	375.998	457.699	474.715	269.543	195.272	219.097
NP_001093104	Myof	615.056	701.726	853.404	1428.35	1199.09	1221.44
NP_001003893	Masp2	10.9262	0.00162328	30.3398	148.824	89.9992	120.984
XP_017173574	Zfp385b	15	10.2144	0	48.7292	35.6409	39.0629
NP_109649	Uck2	165	211.405	143.698	381.063	340	302.032
NP_766334	Hirip3	195	145	195	83	77	91
XP_006539943	Wdr62	140.334	106.05	149.857	54.5467	39.5948	60.1523
NP_001036819	Rorb	0	0	0	5	3	3
NP_001012309	Nsrp1	133	118	122	100	94	99
XP_006507980	Lcmt1	17.0106	19.073	20.0119	43.9799	31.9562	39.7536
XP_006531870	Efemp2	30.3852	18.7105	14.316	49.8985	65.3608	55.8931
NP_057905	Gpc1	310	248	236	461.222	393	434
NP_808479	Zfp459	11	15.8447	12	4.87179	2	0.728377
XP_006534349	Slc38a10	108.238	94.5018	159.557	20.8997	2.23e-05	0.00228296
NP_001070735	Hnrnpd	144.725	124.02	134.496	93.8265	69.2487	86.6925
XP_011241405	Gm40595	46.6324	45.3052	36.1503	21.6791	21.416	12.4563
NP_079603	Krtcap2	229.062	222.455	245.055	305.966	292.107	275.899
XP_006508283	Klhl35	36.4494	31.7696	40.4673	59.941	54.5598	51.3969
XP_006540773	Polg	85.7898	96.5243	64.2877	28.9631	7.16e-05	0
XP_011247074	Ksr1	0	0	0	14.4125	7.89641	15.3925
XP_011247077	Ksr1	0	0	0	14.4125	7.89641	15.3925
NP_001028416	Fancd2	184	209.128	257.996	57.9845	66	106
NP_038580	Hmmr	186	199	273	77	34.186	68.294
XP_017167991	Snx25	7.33689	0.0174396	0	16.1867	18.9393	15.1097
XP_006537664	Col15a1	310.671	235.363	382.7	10.1104	0	94.209
NP_666320	Neil3	118	177	188	34	36	54
NP_001272360	Eef1d	25.3786	20.3957	14.6956	3.95e-06	4.97449	0.821581
NP_001272361	Eef1d	25.3786	20.3957	14.6956	3.95e-06	4.97449	0.821581
NP_001272362	Eef1d	25.3786	20.3957	14.6956	3.95e-06	4.97449	0.821581
NP_032012	Fap	32.9232	37.6588	38.3826	20.2788	21.2623	26.504
XP_006498809	Fap	32.9232	37.6588	38.3826	20.2788	21.2623	26.504
NP_001123951	Nucb2	144.211	131.868	138.447	184.899	186.284	165.193
XP_006508087	Nucb2	144.211	131.868	138.447	184.899	186.284	165.193
XP_006508088	Nucb2	144.211	131.868	138.447	184.899	186.284	165.193
NP_033903	Bub1b	462.619	430.314	578.327	113.745	73.0899	235.299
XP_006519025	Arhgap22	46.3865	50.322	50.3858	5.04663	24.941	2.19268
XP_006517840	Fam151b	0	0	0	6.71957	11.9076	13.4421
NP_001030054	Kbtbd6	13.9087	18.4469	15.434	2.90478	4.69638	8.14023
XP_006496102	Stk36	16.9491	33.3252	24.1414	50.2996	59	51
XP_006530726	Fanca	90.5239	73.6114	109.471	19.383	17.2291	39.9782
NP_001171529	Txnrd3	62.4966	57.38	57.0639	94.5481	97.5971	78.9324
NP_080835	Txndc17	316	276	303	360	357	367
NP_033186	Sftpd	4	3	1	16	10	16
NP_647464	Kif18a	84.3274	78.1366	120.975	21.5048	0	23.5191
XP_006516534	Wdr37	15.3566	0	0	54.1228	61.4519	37.0547
XP_006532904	Rufy1	262.356	264.856	264.32	372.527	318.967	369.552
XP_006509682	Psd3	0	0	0	28.7703	48.7567	27.8932
XP_011249013	Sars2	37.18	23.8539	39.8158	0	3.2912	9.5937
NP_001300887	Krt16	3.35261	9.06804	10	46.2326	50.0749	29.3789
NP_001269921	Pcnt	1017.22	955.571	1232.94	604.853	615.661	661.216
NP_034058	Col15a1	89.3288	133.637	133.3	424.89	276	355.791
NP_659145	Gatb	143.029	130.711	146.1	110.946	91.3383	89.4465
NP_031642	Cav1	5.5	8.72172	3.47731	20.6876	32	34.5583
XP_006505037	Cav1	5.5	8.72172	3.47731	20.6876	32	34.5583
XP_011244412	C2cd2	0	0	0	14.0102	7.18575	14.1937
XP_006513442	Rassf3	19.4191	58.1559	52.3965	110.824	138.663	111.912
NP_038935	Fbxw4	61.7284	57.1523	42.3431	26.166	16.38	17.6288
XP_017177391	Acpt	58.0615	118.884	106.613	0	0.00584887	0
XP_011246585	Adcy7	12.3391	13.5029	22.3414	0	0	0
XP_006516429	2700049A03Rik	44.8152	54.8504	45.4012	27.0597	17.6965	9.86283
XP_006497700	Cacna1b	0	0	0	21.9846	10.6644	19.3034
NP_081973	4933413G19Rik	17	24	26	7	4	9
NP_034930	Bhlha15	11.2306	18.0649	13.762	1.4e-06	0	4.67207
XP_006524080	Chtf18	173.552	140.626	156.464	30.4687	27.4234	86.7485
XP_011248848	Arhgap33	22.5086	18.6077	29.4156	7.53242	0	4.71121
NP_001020758	Nr2c2ap	4.20814	3.89942	5.66275	11.2852	12.8027	8.86997
NP_001155978	Troap	50.163	39.7085	34.7501	12.5	10	20
NP_084435	Troap	50.163	39.7085	34.7501	12.5	10	20
NP_085099	Dsg3	7	11	0	25	36	40
NP_001157827	Ska1	21.5	23.5	34	7.5	5.5	7
NP_079857	Ska1	21.5	23.5	34	7.5	5.5	7
XP_017170192	Ranbp17	10.5482	11.0878	9.10669	0	4.91479	0.248279
XP_006529946	Acbd6	0	2.18027	0	15.5053	17.9492	9.19369
NP_001135447	Tpx2	65.75	51.125	69	18.125	13.5	33.25
NP_001135448	Tpx2	65.75	51.125	69	18.125	13.5	33.25
NP_001135449	Tpx2	65.75	51.125	69	18.125	13.5	33.25
NP_001135450	Tpx2	65.75	51.125	69	18.125	13.5	33.25
NP_082385	Tpx2	65.75	51.125	69	18.125	13.5	33.25
XP_006500276	Tpx2	65.75	51.125	69	18.125	13.5	33.25
XP_006500277	Tpx2	65.75	51.125	69	18.125	13.5	33.25
XP_006500278	Tpx2	65.75	51.125	69	18.125	13.5	33.25
NP_034920	Melk	135.684	131	177.309	42.1346	33	75.9994
XP_011241255	Kif15	109.695	118.886	175.416	0	0	39.9963
XP_011243224	Pcca	14.1204	13.3809	11.0204	20.9722	23.7943	18.8894
XP_006530724	Fanca	22.5721	45.653	31.2212	0	6.58e-07	0
NP_997564	Bcl2l11	61.0798	78.0551	48.8995	19.5295	16.6488	23.5693
XP_017170145	Cpsf4l	0	0	0	13.3639	7.49982	15.9199
NP_663346	Eif2b1	189.909	156.22	197.263	239.023	254.176	262.843
NP_068688	Qtrt1	96.5038	82.8656	83.0072	42.414	61.9346	43.4755
NP_033151	Atxn2	230.53	193.534	204.801	137.43	146.359	106.852
XP_006514596	Il9r	31.5735	59.6539	41.1046	5.66409	1.85129	2.56342
XP_006507690	Emsy	50.3719	48.6641	24.3213	0	0	0
NP_001028311	AI846148	29.6342	52.7511	42.0332	116.999	153.591	101.26
NP_035443	S100a6	917	867	654	1645	1278	1627
NP_932063	Kif18b	100.5	69.5	81	19	16.5	41
XP_011247545	Kif18b	100.5	69.5	81	19	16.5	41
NP_663563	Kif22	207.577	180.757	246.532	46.799	32.5365	110.147
XP_006540603	Grwd1	71.7589	98.3738	109.828	19.0456	42.1775	26.9718
NP_705789	Nudt6	7.15586	4.00788	8.61823	0	0	0
XP_006528833	Kdm5c	49.4036	58.2107	69.5945	138.017	99.398	123.809
NP_001074249	Ret	17	0	14.5899	34.0146	42.3321	40.2212
XP_006503502	0610037L13Rik	30.6948	26.6619	32.3443	16.9982	15.7838	7.54041
NP_001162143	Gtse1	77.5	61	66	30	20.5	41.5
NP_038910	Gtse1	77.5	61	66	30	20.5	41.5
XP_006509289	Ckap2	65.2816	65.1741	87.8614	24.2432	19.6759	38.425
NP_001139302	Plcb1	67.3125	89.1045	89.2282	119.658	138.292	122.175
NP_080688	Knstrn	120.43	108.632	145.004	48	41	74
NP_081838	Clec2g	34.5241	30.159	48.9919	106.724	117.507	77.8538
XP_006505691	Itpr1	404.401	362.922	385.724	660.386	550.008	534.841
XP_006523415	Fndc1	4	0	0.999975	12	20	22.9721
XP_006538861	Eif4g3	62.4935	66.3759	50.5445	27.7268	12.626	31.7025
NP_608301	Kif2c	163.105	135	196	59	12.6487	69
XP_017177596	Athl1	33.2628	27.805	35.2948	19.8511	9.54675	13.6138
XP_011240798	Rnf214	176.416	199.397	164.082	126.104	133.413	115.491
NP_001240724	Tarbp2	39.8612	79.7424	61.0062	0	0	10.0241
NP_001096081	Smyd4	96.3836	87.1912	84.6412	73.4291	71.3565	71.9785
NP_780447	Rif1	112.208	168.936	144.113	67.2438	22.834	27.1473
NP_035626	Aurkb	308.774	232.455	255.794	75	79.675	155
XP_017170099	Dnah2	2.12e-07	8.88e-07	10.7725	33.5631	21.0725	28.3064
XP_006528807	Msl3	140.859	157.881	155.964	71.7653	87.9689	112.185
NP_001276435	Dcstamp	82.4885	107.115	97.9462	49.2343	27.8088	55.1698
XP_006506528	Eefsec	32.1473	30.8256	17.3138	6.62552	0	0
NP_035854	Xirp1	6	5.5	7.5	12.5	11.5	16
XP_011241260	Xirp1	6	5.5	7.5	12.5	11.5	16
XP_017172067	Pphln1	93.2363	91.9221	97.5492	0.000264358	15.3339	51.4198
XP_006504197	Klhl5	306.531	205.684	311.505	125.649	90.492	100.938
XP_017173075	Mlst8	15.5713	17.102	21.4818	9.21715	2.51898	2.56218
XP_017173076	Mlst8	15.5713	17.102	21.4818	9.21715	2.51898	2.56218
XP_006533196	Engase	42.4774	73.3801	55.5592	11.8106	12.6247	18.2854
XP_006532514	P2rx1	8	8	11	0	3.9345	0
NP_034750	Kif15	331.018	339.877	460.898	113.019	139.896	197.57
NP_035627	Aurka	197	183	208	120	89	142
XP_017168900	Cep63	68.7162	59.829	92.5957	23.0457	25.3743	1.76558
NP_001230677	Rassf1	65.2227	53.9081	75.3099	30.3123	24.2721	38.0407
XP_017176998	Cecr5	19.09	23.547	19.3646	0	3.86895	10.6667
NP_775279	2310035C23Rik	394.456	497.23	388.702	244.841	260.117	178.908
NP_062285	Prx	3.24664	0	0.474444	5.7786	5.80055	6.45749
XP_017171176	LOC108168101	12.8631	10.827	12.2941	9.44	8.84971	8.49572
XP_017171177	LOC108168101	12.8631	10.827	12.2941	9.44	8.84971	8.49572
XP_017171178	LOC108168101	12.8631	10.827	12.2941	9.44	8.84971	8.49572
XP_017171179	LOC108168101	12.8631	10.827	12.2941	9.44	8.84971	8.49572
XP_017171180	LOC108168101	12.8631	10.827	12.2941	9.44	8.84971	8.49572
XP_006529781	Dennd1b	39.0408	33.3908	46.0421	3.66e-06	0	18.7035
NP_653136	Dlgap5	157.137	194.144	106.333	13.943	26.0003	45.2534
NP_001171077	0610010K14Rik	18.4857	13.1921	18.7843	0	6.33198	6.14994
NP_001157834	Cep55	16.5289	19.7692	26.0608	5.44444	4.55556	9.28278
NP_082569	Cep55	16.5289	19.7692	26.0608	5.44444	4.55556	9.28278
XP_006527459	Cep55	16.5289	19.7692	26.0608	5.44444	4.55556	9.28278
XP_006527460	Cep55	16.5289	19.7692	26.0608	5.44444	4.55556	9.28278
XP_006527461	Cep55	16.5289	19.7692	26.0608	5.44444	4.55556	9.28278
XP_006527462	Cep55	16.5289	19.7692	26.0608	5.44444	4.55556	9.28278
XP_006527463	Cep55	16.5289	19.7692	26.0608	5.44444	4.55556	9.28278
XP_006527464	Cep55	16.5289	19.7692	26.0608	5.44444	4.55556	9.28278
XP_011245683	Cep55	16.5289	19.7692	26.0608	5.44444	4.55556	9.28278
XP_006511025	Tfdp2	26.3744	17.5177	29.214	75.8458	83.5361	51.9894
NP_001074611	Kcnq4	0	0	0	7.2746	4	9.10422
NP_001243071	Fsbp	16	21	19	12	9	7
NP_001155209	Siva1	16.8559	13.6793	19.0304	9.24889	4.52624	7.52047
XP_011247218	Cntrob	55.3881	42.0278	47.0641	0	17.0673	22.1393
XP_006497454	Mllt10	135.222	158.632	161.261	98.662	61.9404	97.0013
NP_079703	Rgcc	103	118	74	224	196	165
NP_001028656	Iqgap3	615	390.798	638	146	135	226.427
XP_006505388	Irak2	0	0.17786	0.00059273	188.164	173.102	82.972
XP_006533180	Tmc6	256.456	234.876	160.015	388.387	347.172	349.897
NP_705772	BC030867	76.184	83.1352	60.7035	15.8283	14.5303	41.3934
NP_076376	Gcnt2	4.70588	3.51943	6.98876	33.1846	18.1434	24.3821
NP_035346	Ptpro	101.227	95.4054	98.1406	46.1056	25.5612	65.6071
NP_001269037	Slc10a7	17.2119	23.5718	20.1347	7.66888	10.0705	12.3764
XP_006513622	Agap2	167.665	248.142	170.673	41.6933	48.1968	89.2005
XP_006507812	Rnf40	979.719	1238.93	1240.79	793.389	602.005	682.101
XP_006515269	Pxdn	41.8246	31.0588	18.3084	0	9.62e-05	0
NP_080515	Tmem35	2	3	0	10	9	6
NP_659066	Camk1g	1	0	0	5	3	3
XP_006509365	Pcm1	177.431	233.003	172.595	116.425	93.4187	97.9166
XP_017171272	Mycbp2	173.29	28.1158	73.0754	297.47	484.005	457.799
NP_075712	Cdc20	340	246	331	124	93	179
NP_694810	Slc36a2	77.5731	70.007	79.772	45.1907	29.8517	53.1776
NP_444403	Kifc5b	172.478	170.612	133.643	78.8706	40.1952	91.7831
XP_006514743	Ikzf1	136.135	151.454	148.886	58.9636	50.4656	102.752
NP_081388	Capns2	172	153	171	105	44	90
NP_001276695	Zap70	142.566	141.706	117.411	0	0	70.6359
NP_082197	Slc16a14	7.5	6.5	6	24	14.5	18.5
XP_006496614	Slc16a14	7.5	6.5	6	24	14.5	18.5
XP_006531346	Ntpcr	26.1799	16.0753	22.8176	3.63076	0	9.01293
XP_006513506	Stk11	45.6837	60.4871	75.3468	19.8421	6.30559	23.1552
NP_032038	Akr1b8	16	11	5	24	34	32
XP_017175904	Gale	66.7636	49.7118	46.9612	25.8915	28.0784	27.5558
XP_006519658	Pinx1	14.0084	7.42839	17.5452	0	0	0
NP_062357	Alyref2	39	37	38.3534	26.2312	22.0742	31.0752
NP_659067	Ncaph	355	289	390	151	128	221
NP_659114	Reep2	29	32	31	4.09e-05	12	16
NP_001074586	Mki67	4118.91	4701.62	5879.02	1358.76	1197.56	2762.11
XP_006529343	Sp100	28.8438	0.893112	38.535	78.6007	128.632	100.88
XP_011248504	Masp2	78.0738	132.998	182.66	0.176288	0.000799849	0.0164935
XP_006511767	Ppp2r3a	45.6822	15.6875	14.0728	68.2349	82.8605	70.4305
XP_011247974	Nudt6	7.93067	3.74795	4.72917	0	0	0
NP_001156984	Rgs12	0	42.1674	22.645	117.175	76.2344	92.4853
XP_006523883	Kat2b	4.32e-08	0	0	98.0155	102.043	43.7805
XP_006505235	Tmem209	0	0	0	22.6761	10.5045	13.8852
XP_006538012	Casp8ap2	231.173	335.598	325.31	96.7064	47.115	156.108
NP_034608	Hspa1b	1556.02	1276.31	1146.07	853.265	684.185	755.137
NP_001297660	Rnf220	28.3282	25.0539	45.3856	0.000682405	8.82181	0.708458
XP_011238891	Rnf220	28.3282	25.0539	45.3856	0.000682405	8.82181	0.708458
XP_017175846	Rnf220	28.3282	25.0539	45.3856	0.000682405	8.82181	0.708458
NP_084111	Ticrr	239	223	283	80	65	159
XP_006514965	Sfi1	378.25	459.297	411.488	280.385	121.098	169.681
XP_017176284	Prr14l	95.0561	98.0725	53.2392	162.707	149.654	139.198
XP_006519019	Arhgap22	538.065	599.24	457.211	359.449	248.183	315.53
NP_001171184	Cyp26b1	4.61013	5.71757	0	10.5	14.8345	12.5287
NP_780684	Cyp26b1	4.61013	5.71757	0	10.5	14.8345	12.5287
NP_084423	Brd8	242.349	255.181	347.767	129.453	135.538	150.246
XP_006540594	Acpt	0	7.11254	1.98e-08	54.0998	71.4109	31.5558
XP_017177390	Acpt	0	7.11254	1.98e-08	54.0998	71.4109	31.5558
NP_038874	Ror2	0	0	1	2	3	2
NP_766102	Tmem71	72	64.7588	85.2377	39.8117	37	51.1383
XP_006530189	Ube3b	52.1598	36.1959	39.3035	19.2216	22.6117	22.2491
NP_001273292	Tcf25	135.585	120.197	105.232	87.6266	74.6832	72.6569
XP_006528235	Srpk3	93	73.8707	80.7718	56.3948	60.8541	51.3078
XP_006501304	Ap1ar	15.6228	0.129143	16.8967	59.6999	44.5744	37.037
NP_573495	Pfkfb3	966.892	985.326	1067.12	696.01	556.011	797.737
NP_765994	Trak2	261.667	243.894	287.292	214.624	183.8	199.282
XP_011236902	Trak2	261.667	243.894	287.292	214.624	183.8	199.282
XP_017173587	Sipa1	65.9916	57.9044	59.9777	50.9871	43.0556	41.352
XP_017173588	Sipa1	65.9916	57.9044	59.9777	50.9871	43.0556	41.352
XP_017173589	Sipa1	65.9916	57.9044	59.9777	50.9871	43.0556	41.352
XP_017173590	Sipa1	65.9916	57.9044	59.9777	50.9871	43.0556	41.352
XP_017173591	Sipa1	65.9916	57.9044	59.9777	50.9871	43.0556	41.352
XP_017173592	Sipa1	65.9916	57.9044	59.9777	50.9871	43.0556	41.352
XP_017173593	Sipa1	65.9916	57.9044	59.9777	50.9871	43.0556	41.352
XP_006503538	Fggy	28.144	44.8702	38.2123	14.855	10.3353	18.2092
XP_006512753	Nhsl1	0	0	1.06e-08	50.6404	84.9502	38.8777
NP_001273395	Btrc	1.96e-05	0	0	38.4151	15.6022	33.8359
NP_062380	Tbx21	87	126	122	41	35	65
NP_032619	Foxd2	20	21	14	5	7	10
XP_017177693	Tnrc6a	201.283	172.088	204.64	96.5143	26.1305	108.137
NP_899018	Marveld1	97	85	106	157	126	141
NP_075698	Pbk	55	53	84	20	16.5	25.5
XP_006519320	Pbk	55	53	84	20	16.5	25.5
NP_032472	Kif4	324	232.485	357.324	69.8978	72.6283	163.761
NP_031656	Ccnb2	258	236	321	128	99	172
NP_081333	Wdfy1	82.7774	94.2146	105.446	62.9406	29.0105	41.9746
NP_062262	Vcan	257.149	169.233	184.853	713.025	420.398	594.523
NP_080819	3010026O09Rik	110.686	111.924	169.873	348.52	231.168	329.558
XP_011248471	Gpr153	0	0	0	41.0389	16.4873	35.3476
XP_006512698	Hace1	22.6365	23.1562	33.1403	12.0413	0	5.94259
NP_543126	Pask	34.6	39.6	39.6	24.6	15.4	26.4
XP_006529728	Pask	34.6	39.6	39.6	24.6	15.4	26.4
XP_006529729	Pask	34.6	39.6	39.6	24.6	15.4	26.4
XP_006529730	Pask	34.6	39.6	39.6	24.6	15.4	26.4
XP_017176526	Pask	34.6	39.6	39.6	24.6	15.4	26.4
XP_006531361	Tcf25	53.6156	77.2009	86.6639	35.785	27.6477	23.8981
XP_017177446	Blm	43.4083	34.6156	45.5799	12.1329	10.3982	26.1802
NP_001153402	Cenpl	108	125	149	82	76	70
NP_690022	Csnk1g3	38.9605	5.16e-06	41.5688	119.348	139.224	83.7925
NP_598886	Trip10	107.953	143.877	60.9018	247.185	205.846	204.877
XP_006535736	Agap3	12.845	13.5296	8.8491	5.73675	6.06e-06	1.13729
NP_031687	Cdk11b	198.256	181.14	199.613	151.409	95.9896	119.152
XP_011248481	Cdk11b	198.256	181.14	199.613	151.409	95.9896	119.152
XP_006537914	Ptbp3	321.685	179.52	187.342	4.15e-05	61.8819	0.000452725
NP_783595	Hist1h2bb	44.4676	30.4635	25.8749	11.7373	9.63799	9.57627
NP_796135	P4ha3	0	0	4.53736	7.46872	7.69868	9
NP_001277696	Pnkp	4.27254	0.162628	29.0702	83.2171	50.296	91.414
NP_932117	1700001O22Rik	7.70152	7.41633	12	3.58524	0	0
NP_065606	Angptl4	43	35	28.5	53.5	62	53.5
XP_006540707	Igf1r	53.7293	57.548	35.3597	9.18585	24.0793	10.0391
NP_001290200	Agfg2	0	0	0	14.3487	6.96633	17.6762
XP_006531114	Lpcat2	39.2721	46.5947	28.7885	8.36234	13.7621	18.8168
NP_001182227	Kifc1	185.761	126.818	149.178	58.5647	27.9024	84.1084
NP_034179	Dhfr	76	63	66	32	23	48
XP_011240601	Mpv17l2	17.9078	26.4131	26.9839	52.4769	46.3448	37.3612
NP_631892	Agap3	37.1862	33.2656	56.7319	14.8815	3.82e-07	8.72637
XP_006519793	Slmap	0.00628446	3.09e-07	1.42e-05	160.387	165.788	66.9876
XP_017171100	Ddx41	80.431	94.4709	70.016	50.0858	15.028	26.0915
NP_035262	Pole	758	904	1038	349	281.932	581
XP_006508014	Cyb5r2	3.32003	3.99709	4.26257	1.80693	1.74545	0
XP_017177401	Grwd1	106.121	107.925	112.367	62.7548	8.02239	50.9385
NP_001103632	Cdca2	43.6495	42.6017	70.9659	19.0165	4.79297	8.40872
NP_780593	Cdca2	43.6495	42.6017	70.9659	19.0165	4.79297	8.40872
XP_006518483	Cdca2	43.6495	42.6017	70.9659	19.0165	4.79297	8.40872
NP_031883	Dhh	0	0	0	7	2.80619	5
XP_006514278	Sppl2b	5.91414	6.71955	12.4278	0	0	0
XP_006533993	Myo19	21.536	19.6393	37.2732	0	5.95739	2.76e-05
XP_006535898	LOC102638085	8	6	8.95849	4.06618	2.4498	4
XP_011239756	Zfp746	35.8849	15.491	39.3156	0	0	0
NP_997650	Krt73	0	1	0	16	19	34
NP_001240737	Racgap1	144.25	131	194	52.75	36.75	86.25
NP_001240738	Racgap1	144.25	131	194	52.75	36.75	86.25
NP_036155	Racgap1	144.25	131	194	52.75	36.75	86.25
XP_011243948	Racgap1	144.25	131	194	52.75	36.75	86.25
XP_017170369	LOC108167339	176	180	174	140	83	97
NP_001124526	Pttg1	40.8515	59.601	46.8692	23.9993	18.638	28.6706
XP_006533578	Pttg1	40.8515	59.601	46.8692	23.9993	18.638	28.6706
XP_006533579	Pttg1	40.8515	59.601	46.8692	23.9993	18.638	28.6706
XP_017175161	Spata5	209.682	135.039	145.635	48.6425	80.3345	37.4641
XP_006513197	Ank3	0	1.27e-08	7.48267	32.8657	72.0639	78.4193
NP_001025155	Fcrlb	64.6975	54.1487	29.727	137.018	105.737	97.8579
XP_006540060	Map4k1	56.5021	54.9355	95.8806	21.9846	0	0
XP_006501286	Sort1	53.1505	37.1303	31.143	70.3777	74.3733	64.131
NP_001297470	Tacc3	44.9119	58.5299	43.6033	11.9991	26.2923	0
XP_006503895	Tacc3	44.9119	58.5299	43.6033	11.9991	26.2923	0
NP_058020	S100a11	1105	1071	919	1771	1422	1440
NP_001138327	Ppfia4	38.3997	37.3407	32.3499	26.5027	15.5734	21.626
NP_663592	Herc1	1388.68	1638.33	1675.94	1241.8	1103.76	1024.21
XP_017169419	Cdh23	397.494	318.631	415.375	259.703	143.966	180.762
NP_033130	Rrm2	372	321	437	156	131	249
NP_001020768	Ikzf1	70.3657	81.0832	93.252	56.0305	37.3768	48.1283
NP_001288792	Ikzf1	70.3657	81.0832	93.252	56.0305	37.3768	48.1283
XP_006514739	Ikzf1	70.3657	81.0832	93.252	56.0305	37.3768	48.1283
NP_619589	Olr1	42.1631	61.0927	48.065	86.8429	72.7967	94.925
NP_033039	Rad51ap1	39.7974	29.7836	34.1984	19	23.9794	21.7317
XP_006515152	Dock4	224.426	355.693	287.202	140.384	134.028	134.667
NP_808454	Depdc5	123.147	202.071	142.719	63.8829	28.5697	59.3801
NP_001103679	Lnp	46.0369	53.4952	57.7515	35.0512	36.5945	24.7778
NP_031828	Ctsk	25	25.5	29.5	50.5	36.5	45
XP_006501037	Ctsk	25	25.5	29.5	50.5	36.5	45
XP_006512895	Ppil4	70.3627	89.7622	97.2143	49.0443	38.9591	15.4101
NP_758502	Tshz3	13.9999	16	15.9998	0	9	0
NP_001297688	Zfp653	218.334	182.46	206.122	142.775	165.213	149.305
XP_006538070	Tmem67	74.9445	74.6835	44.6623	14.8991	29.8456	14.9104
XP_006531583	Pard3	0.270871	42.5351	0.000101984	122.771	106.115	69.0375
XP_006508366	Prss23	5.52129	0	3.49004	63.1055	81.9935	33.6854
NP_082748	Bmper	1	0	0	4	2	3
XP_017169966	Utp18	94.1019	108.097	109.671	69.1844	26.3907	54.5011
NP_033819	Birc5	154.997	127.384	203.171	68.3	30	74.1471
NP_001297571	Rpe	31.0352	34.9697	25.4182	14.5499	17.9811	20.2275
NP_840000	Cenpm	16.4736	13.4261	18.5681	9.70492	2.15157	3.51247
XP_006498938	Mybl2	1948.33	2601.25	1973.23	638.175	769.665	1377.93
XP_006502995	Urod	12.7686	9.62684	14.9283	21.9549	32.6535	24.9814
XP_017174590	Baz2b	176.867	145.043	152.278	197.894	193.593	207.401
NP_808296	Fam167a	8	6.66667	5.66667	13	10.6667	15.6667
XP_006518940	Fam167a	8	6.66667	5.66667	13	10.6667	15.6667
XP_006518941	Fam167a	8	6.66667	5.66667	13	10.6667	15.6667
XP_006505395	Tspan9	8.88e-08	0	0	14.089	27.0441	12.836
XP_011246247	Sox13	0	0	0	9.7351	7.95277	3.67362
NP_001156912	Mov10	660.997	562.667	601.595	424.378	425.042	506.894
NP_033805	Aoc3	2	5.08225	6.32578	9	10.1528	10.1399
NP_569716	Colec12	434	263	377	985	746	1287
XP_006539752	Ryr1	3.20231	0.963208	7.83892	18.1504	23.042	12.9014
NP_075019	Rgs18	12.7095	12.7767	22.4475	55.6896	33	54.6284
NP_001278082	Xaf1	52.697	51.7408	48.7926	29.1464	13.7853	34.799
NP_080791	2810417H13Rik	166	184	264	72	81	96
NP_840094	Brip1	106.5	96.5	129	44.5	35.5	74
XP_006533302	Brip1	106.5	96.5	129	44.5	35.5	74
NP_031620	Calu	358.603	303.868	377.793	485.53	432.873	444.225
XP_006529807	Scly	57.5253	61.81	80.1515	182.036	124.319	127.987
NP_001177380	Dcn	5.5	2.5	2	20.5	14	11
NP_031859	Dcn	5.5	2.5	2	20.5	14	11
XP_006540719	Kcnc3	0	5.37568	0	11.3021	7.97671	10.1561
XP_006540720	Kcnc3	0	5.37568	0	11.3021	7.97671	10.1561
NP_473385	Adgra2	4.82393	20.249	0	67.3278	56.7606	34.81
NP_001271156	Flot2	25.4189	25.9267	29.1378	61.1713	53.5774	39.9889
XP_006510484	Bbs9	65.7814	46.0832	62.6114	10.5462	34.9413	14.0338
NP_001161941	Ube2m	53.3639	61.8483	63.9846	88.4844	102.334	127.306
XP_017176069	Dcun1d4	0	0	0	12.2014	4.83276	7.9833
XP_017170362	LOC108167858	343.949	397.458	438.422	279.73	172.808	241.35
NP_082315	Esco2	61	67	111	16	12	23
XP_006509363	Pcm1	85.6135	176.4	115.638	28.875	0	20.8852
XP_006500840	Slc7a11	21.4799	42.043	31.7176	91.7616	59.382	73.672
XP_011240067	Tnrc6a	64.3335	61.8325	58.1813	157.858	105.227	113.351
XP_006520829	Fam49b	77.2614	36.9844	97.3118	3.95907	1.38e-05	0
NP_780772	Prr11	53	43.5	72.5	17	10	27
NP_717095	Rnf26	476	415	524	349	299	350
XP_011237790	Zfp341	63.8155	51.2082	61.9993	34.6647	3e-08	0
XP_006523582	Birc6	717.483	56.6625	233.299	1086.15	1441.83	1127.58
NP_033958	Ccna2	188	152	261.5	41	43	93
XP_017174933	Ccna2	188	152	261.5	41	43	93
NP_780628	Actr5	418.269	394.964	390.26	313.03	204.784	289.583
XP_017167983	Sf3b3	339.609	354.385	373.091	274.332	199.663	146.364
NP_001034441	Nolc1	172.838	201.549	148.587	18.5962	100.412	72.4151
XP_017168030	Cacna1a	166.861	235.613	294.395	106.693	8.51525	29.4492
NP_666058	Fanci	175.887	282.696	254.323	67.3302	107.715	121.267
NP_082275	Haus5	351	394	373	304	204	216
NP_081703	Taf15	734.58	875.231	794.273	663.53	570	598
NP_001289265	Mrpl55	24.1685	20.9146	28.429	36.9423	31.7948	36.1412
NP_080311	Mrpl55	24.1685	20.9146	28.429	36.9423	31.7948	36.1412
XP_006534041	Mrpl55	24.1685	20.9146	28.429	36.9423	31.7948	36.1412
XP_006529323	Ptprc	663.115	805.271	710.431	364.014	182.183	489.334
XP_006513051	Pan2	22.5692	0.000627402	3.58555	143.807	77.0223	76.7371
XP_011237925	Accs	26.5394	37.8588	36.9858	11.1098	21.3694	11.6693
XP_006509585	Micu3	33.482	56.6341	47.2809	20.4488	20.9398	15.6127
NP_031738	Clk2	514.233	467.172	508.34	357.384	305.3	416.692
XP_011245837	Arhgap4	306.861	293.456	222.533	110.757	112.015	184.904
XP_017176314	Kmt2c	0	59.7076	0	105.466	108.782	87.7767
XP_006505552	Dctn1	55.6579	38.3144	0.796065	128.471	86.4437	116.17
XP_006503098	Oscp1	0	0	0	9.82435	13.5468	5.04877
XP_006504934	Pan3	14.8373	29.8766	33.014	0	0	7.22209
XP_011236807	Ikzf2	6.2421	15.5761	16.8857	0	0	0
XP_011236808	Ikzf2	6.2421	15.5761	16.8857	0	0	0
NP_808534	Catsper4	0	0	0	3.3482	6.49692	3
XP_006525840	Tcof1	405.537	705.592	508.298	184.711	0.024772	189.159
NP_598473	Klk10	137	113	51	271	195	225
NP_663759	Hist1h1d	1980.59	1205.57	1853.15	597.342	405.498	868.233
XP_006511787	Apeh	74.4571	132.582	110.115	46.7077	21.1007	0
XP_006530972	Zfp612	0	0	0	9.60673	4.33304	5.05656
XP_006530973	Zfp612	0	0	0	9.60673	4.33304	5.05656
NP_598917	Actn1	2092.33	1992.54	1577.03	3352.8	2590.7	2852.34
XP_006526743	Gda	0	0	0	21.0237	24.0243	8.6881
XP_006539566	Clcn4	40.613	42.7369	38.5897	82.4759	56.8625	83.7492
NP_775605	Zfp775	18.5	15	14	10.5	7	10
XP_006506141	Zfp775	18.5	15	14	10.5	7	10
NP_598576	Lbr	279.75	295.25	358.75	206.75	106.25	180
XP_006497133	Lbr	279.75	295.25	358.75	206.75	106.25	180
XP_006497134	Lbr	279.75	295.25	358.75	206.75	106.25	180
XP_017168530	Lbr	279.75	295.25	358.75	206.75	106.25	180
NP_780493	Fzd10	3	2	0	5	8	9
XP_017173263	LOC108168358	31	23	35	18	14	14
XP_011248712	Spred3	10.3637	13.7773	5.49502	28.37	21.2885	36.1989
XP_006514511	Thoc5	26.1895	49.8184	35.3885	14.0132	6.43837	0
XP_006515149	Dock4	910.509	514.858	869.158	317.461	289.141	217.27
NP_001230004	Cep57l1	15.4349	18.3417	29.6173	7.0445	1.15106	0
XP_006530952	D230025D16Rik	0	6.07511	1.91e-07	16.0844	10.2459	20.4134
NP_821135	Pigk	3.5798	3.36888	0	6.26511	10.1364	9.38401
XP_006510508	Arhgap32	0	0.131288	0	38.9606	24.5356	15.175
XP_011240862	Arhgap32	0	0.131288	0	38.9606	24.5356	15.175
NP_001243037	Mib2	0.986403	18.4744	19.2188	96.1631	53.9512	56.8963
NP_660106	Mib2	0.986403	18.4744	19.2188	96.1631	53.9512	56.8963
XP_006515578	Mark3	32.7043	86.5873	86.6151	2.27108	9.89e-06	1.24e-07
NP_112444	Il1rn	33.947	0	4.93226	46.981	68.1786	70.2765
XP_006533893	Zmynd15	98.1299	79.7625	127.834	30.5668	14.2463	54.4534
NP_001020536	Miip	246.838	245.517	243.245	199.168	122.552	163.034
XP_006527729	Otud5	77.4957	83.8873	66.2911	55.5971	30.5804	40.7654
NP_001276452	Cad	45.8821	26.848	42.4921	0	0	18.619
ds_NP_034745	Kif11	202.5	252	363.5	67	71.5	114.5
NP_034745	Kif11	202.5	252	363.5	67	71.5	114.5
NP_001103741	Abhd14a	7.27621	5.38365	3.98351	13.3282	9.49803	10.6
NP_666031	Abhd14a	7.27621	5.38365	3.98351	13.3282	9.49803	10.6
XP_006511866	Abhd14a	7.27621	5.38365	3.98351	13.3282	9.49803	10.6
XP_006511867	Abhd14a	7.27621	5.38365	3.98351	13.3282	9.49803	10.6
XP_006511868	Abhd14a	7.27621	5.38365	3.98351	13.3282	9.49803	10.6
NP_001272720	Ildr1	0	18.4259	0	54.9177	40.1407	30.1695
XP_006538135	Rgs3	51.1114	46.4805	52.1078	12.2404	9.87626	35.0171
XP_017171285	Epsti1	29.2517	16.0661	16.5976	5.06013	0	4.81536
NP_821139	Hyal3	13	21	10	42	37	27
XP_017175500	Usp48	122.734	207.435	160.3	39.8787	85.2555	32.8486
XP_017172121	Spag1	4.29218	3.46e-07	6.81283	13.6153	15.3717	10.2378
XP_017172122	Spag1	4.29218	3.46e-07	6.81283	13.6153	15.3717	10.2378
XP_017172123	Spag1	4.29218	3.46e-07	6.81283	13.6153	15.3717	10.2378
XP_017172124	Spag1	4.29218	3.46e-07	6.81283	13.6153	15.3717	10.2378
NP_001138464	2810459M11Rik	0	0	0.00533309	10.7834	7.25748	4
NP_080805	2700062C07Rik	69	84	83	57	54	63
NP_081052	Vps25	328.427	296.151	337.287	448.917	384.153	394.443
NP_001273437	Azi2	112.678	133.541	91.2754	11.6478	64.9278	1.81481
NP_038755	Azi2	112.678	133.541	91.2754	11.6478	64.9278	1.81481
XP_017173568	Mxi1	76.7039	79.4875	75.4244	53.8231	39.2588	62.1991
NP_083895	Msrb2	5.45126	18.041	24.1634	35.933	37.1999	36.3778
NP_665824	Cetn4	15	21	16	8	11	10
NP_076084	Dut	119.249	137.776	149.412	71.8273	59.8249	102.359
XP_006511114	Tpm1	15.1238	28.0049	39.8524	2.56148	0	3.71e-05
XP_011237820	Prkra	41.8497	69.1297	55.9665	19.9272	28.9212	25.3026
NP_001153078	Pum1	3.62046	0.0298395	9.7065	18.5772	15.0396	14.428
NP_034302	F7	110.466	39.1196	123.584	271.105	178.894	254.664
XP_017173222	LOC108168313	149	133	156	122	102	94
NP_001035886	Kntc1	367.222	312.079	559.676	100.449	115.854	161.143
NP_001165564	Depdc1a	40.9161	41.1847	74.0824	8.41776	5.04118	15.3465
NP_001258495	Cdc7	39.9996	61.1217	52.7206	16.6834	16.3251	31.8289
NP_033993	Cdc7	39.9996	61.1217	52.7206	16.6834	16.3251	31.8289
NP_038810	Ptdss2	126.362	113.802	117.045	167.742	140.7	148.032
XP_006503744	Add1	104.193	88.7093	56.2371	38.1116	2.71e-06	6.15143
XP_011249127	Polg	0.00158163	23.2094	2.70122	53.651	84.9968	44.8761
NP_080913	Ggct	16.6034	24.0978	21.4458	28.9165	29	33.2728
XP_006506429	Rab11fip5	276.435	250.528	259.618	427.443	343.074	341.276
NP_001259020	Tysnd1	0	0	3.82374	10.9549	5.67932	9.88015
XP_011241393	Syne1	218.594	324.21	314.026	3.89e-06	133.143	123.706
XP_006519319	Pibf1	54.7118	88.546	84.7906	18.1906	25.9662	42.3749
XP_011241846	Hcfc2	31.126	37.2193	26.6271	9.34534	21.3101	12.3173
XP_006501073	Gnat2	0	0	0	3.58781	5	1.75187
NP_034418	Gja1	177	205	76	313	311	421
XP_017177828	2610020H08Rik	41.9014	82.4831	58.6421	22.9362	13.0972	12.4073
XP_011243890	Cerk	52.9164	86.4824	50.2207	18.5513	24.0097	16.8917
XP_006498945	Mybpc3	179	175	233.993	135.23	88.9999	74.7493
XP_011237380	Sh3glb2	0	4.35117	0	16.9575	7.68046	16.6611
XP_006515637	Numb	216.817	230.108	180.217	144.816	65.0732	114.668
NP_035499	Shcbp1	110	135	199	55	33	55
NP_031660	Ccnf	245.905	168.595	150.58	49.902	40.7072	98.748
XP_006530943	Dync1li2	53.1127	123.602	72.8959	14.1883	0.00840648	0.00104154
NP_835736	Hist3h2a	323.205	252.092	265	213	176.166	179.186
XP_011245876	Atrx	89.0371	118.035	104.213	63.1771	21.2235	57.1104
NP_075759	Rnf128	226	238	201	333	266	315
XP_006504750	Tnrc18	667.392	722.468	480.674	303.877	295.328	396.843
XP_011239278	Tnrc18	667.392	722.468	480.674	303.877	295.328	396.843
XP_011239279	Tnrc18	667.392	722.468	480.674	303.877	295.328	396.843
NP_035261	Pold1	713	656	722	484	325	541
XP_011245633	AI846148	103.378	109.158	73.691	56.0164	35.6391	54.7232
NP_950172	Sgol2a	106	123	176	48.9196	45.9783	68
XP_006533798	Exoc7	0	9.5053	0	19.6944	39.9091	24.6995
XP_006497972	Sec16a	68.1531	114.086	112.414	43.5029	12.5704	41.6828
XP_006497973	Sec16a	68.1531	114.086	112.414	43.5029	12.5704	41.6828
XP_006523407	Mrpl18	13.2685	20.7349	19.7354	6.06414	10.6184	4.23718
XP_006516655	Fam65b	51.9845	78.2033	77.0687	30.4859	0	31.1919
NP_001289460	Esr1	2.2725	5.0015	3.72467	7.90348	7.0494	6.17934
NP_001289461	Esr1	2.2725	5.0015	3.72467	7.90348	7.0494	6.17934
NP_031982	Esr1	2.2725	5.0015	3.72467	7.90348	7.0494	6.17934
XP_006512496	Esr1	2.2725	5.0015	3.72467	7.90348	7.0494	6.17934
XP_006512497	Esr1	2.2725	5.0015	3.72467	7.90348	7.0494	6.17934
XP_006512498	Esr1	2.2725	5.0015	3.72467	7.90348	7.0494	6.17934
XP_011241368	Esr1	2.2725	5.0015	3.72467	7.90348	7.0494	6.17934
XP_011241369	Esr1	2.2725	5.0015	3.72467	7.90348	7.0494	6.17934
XP_011241370	Esr1	2.2725	5.0015	3.72467	7.90348	7.0494	6.17934
XP_006528834	Kdm5c	52.102	45.8964	75.6385	88.3566	91.4123	101.794
NP_666231	Fam129b	3036	2560	2474	4857	4121	3569
NP_001280702	Palld	52.0128	65.6697	69.2926	87.5751	78.9443	93.1909
NP_081630	Poc1a	66.4521	46.0863	54.5042	21.4641	15.307	36.5052
XP_006503631	Gtpbp10	13.5115	14.7344	20.6534	6.60768	6.08055	9.55251
XP_006511865	Abhd14a	2.61895	3.08174	6.08247	0	0	0
NP_663757	Tox	13	24.3333	17.3333	3.83197	0	7.6767
XP_006538007	Tox	13	24.3333	17.3333	3.83197	0	7.6767
XP_006538008	Tox	13	24.3333	17.3333	3.83197	0	7.6767
NP_076188	Nfatc4	10	6.59e-07	6	32.8856	25	17
NP_473440	1110038F14Rik	16.0756	35.1131	24.3798	6.34871	5.27657	3.51687
XP_006506406	Cracr2a	165.296	235.685	193.087	100.904	68.4618	130.341
NP_525024	Cttnbp2	11.9413	25.1104	11.3902	0	0	0
NP_064418	Hist1h1b	1274	712	1249	245	232	525
NP_032278	Hmgb2	836	782.5	1035.99	367	279	621.982
XP_006509587	Hmgb2	836	782.5	1035.99	367	279	621.982
NP_001153055	Fam219a	8.10858	0	11.5223	28.2469	18.7778	20.7515
XP_006533088	Gpr179	30	27.4276	18	8.43382	13	12
NP_001001806	Zfp36l2	6967	5855	7210	9993	9109	8165
NP_001272799	Trim3	74.1398	80.7688	82.9846	106.184	90.795	109.906
NP_001272800	Trim3	74.1398	80.7688	82.9846	106.184	90.795	109.906
NP_061368	Trim3	74.1398	80.7688	82.9846	106.184	90.795	109.906
XP_011243009	Ipo11	12.8992	16.2853	14.5114	9.62682	7.24541	11.0178
NP_598842	Dnajc9	206	213	242	134	117	179
XP_006503756	Apbb2	93.3406	59.9993	72.5233	42.6989	0.000446261	9.6746
XP_011245331	Trappc8	236.309	227.605	263.905	182.737	86.6825	138.445
XP_006525205	1700061G19Rik	8	10.4427	9.94286	22.3154	14.9622	16.4581
NP_035145	Orc1	56.4857	86.0779	76.7444	31.9042	12.5115	42.3779
XP_006526289	Commd10	78.7558	48.2452	65.5527	35.4342	30.3804	30.3812
NP_778166	Mrpl22	32.0858	46.5	35.945	63.3694	52	57.1605
XP_006532823	Trim41	55.3067	47.0921	80.1042	25.5432	0	21.3388
XP_011245541	Pprc1	98.8217	22.085	78.8153	197.097	151.005	254.201
XP_006529575	Zcchc2	147.421	114.373	85.7846	58.6977	26.2732	0.275627
NP_001297634	Slc16a4	9.98331	8.53528	15.7739	3.62942	3.70419	0
NP_080558	Spc24	63.8717	39.4213	58.5772	8.35399	10.9646	31.4515
NP_001076657	Lig1	299	304.667	350	160.667	125.333	246.667
NP_001186239	Lig1	299	304.667	350	160.667	125.333	246.667
NP_034845	Lig1	299	304.667	350	160.667	125.333	246.667
XP_006505182	Tnpo3	307.922	324.919	356.676	136.776	129.969	257.11
NP_032917	Pnn	478	505	488	426	301	345
XP_006505681	Il17ra	175.7	148.572	147.992	98.345	75.4596	122.947
XP_017175719	Tox	0	0	0	17.5041	12	5.96989
XP_006516060	Ttll5	33.7206	19.0094	0.0015964	165.493	86.5993	91.4878
XP_006521403	Zfp707	9.54734	6.61327	7.77135	38.8094	29.8455	18.4678
XP_006537670	Epha7	0	0	3.81765	39.7339	19.5424	18.7429
XP_006535719	Slc4a2	0	12.1435	14.6866	49.5463	37.8525	26.0399
NP_001028583	Gm826	28	33	53	13	9	10
NP_598484	Asph	38.1696	73.9272	68.0665	27.4781	4.17567	9.33894
XP_006512088	Ulk4	6.46379	17.9813	19.8051	0	0	0
NP_001116155	Bdh1	22	39.5	15	53.5	58	48
NP_780386	Bdh1	22	39.5	15	53.5	58	48
XP_006504810	Iqce	34.9059	25.4514	13.8203	6.12	0	0
NP_031717	Chek1	78	112	118	55.2156	61	58.9562
NP_001036800	Eml1	0	0	0	24	23.7972	8.0345
XP_006499839	Ctdspl2	16.4051	27.9159	28.0999	7.98458	5.79002	12.6356
XP_011237929	Ctdspl2	16.4051	27.9159	28.0999	7.98458	5.79002	12.6356
XP_017174542	Ctdspl2	16.4051	27.9159	28.0999	7.98458	5.79002	12.6356
XP_006511645	Rnf111	2.54096	2.17338	2.30286	1.57063	0.571683	0.0586798
XP_006511646	Rnf111	2.54096	2.17338	2.30286	1.57063	0.571683	0.0586798
XP_006511647	Rnf111	2.54096	2.17338	2.30286	1.57063	0.571683	0.0586798
XP_006514610	Limk2	44.575	43.1104	28.7044	0	11.3307	21.2331
NP_079691	Cks2	204	260	257	142	82	168
XP_006507823	Fus	42.3026	63.1403	53.3278	34.9281	27.2934	28.6087
XP_017177707	Fus	42.3026	63.1403	53.3278	34.9281	27.2934	28.6087
NP_001156772	Safb	1324.53	1256.66	1018.27	858.463	552.831	801.451
XP_006499016	Mapk8ip1	5.90575	14.5105	0	53.8359	31.9571	28.6073
NP_032032	Fgf2	4.10852	4.99858	2.51704	6.42619	9.22764	7.44341
XP_006498396	Fmnl2	648.697	561.168	665.788	373.679	425.684	518.136
XP_006533883	C1qtnf1	48	21.9732	11.1393	66	110	82
XP_011238172	Cep152	95.8119	168.32	193.897	51.052	40.8	55.1803
NP_001303681	Clec2g	8.47586	1.84099	9.00805	28.2757	41.4926	65.1711
XP_006515823	Rcor1	391.603	380.037	405.669	348.969	280.261	263.241
NP_033987	Cd8a	21.6517	25.0218	25.0747	7.82703	0	15.5389
NP_031816	Smc3	748	840	881	709	646	653
NP_056601	Hist1h1c	3476.05	2360.78	3436.84	1826.4	1414.39	1899.17
NP_001161716	Syce2	24.7624	17.6659	26.409	7.06428	12.2946	13.9898
NP_001277336	Sapcd2	17.4294	12.4497	19.3191	0	0	9.57739
XP_006514384	Pym1	20.3073	10.6998	17.8326	2.52347	5.47784	7.3613
NP_081458	Trip13	87	69	95	59	42	54
NP_067480	Anapc5	1500.52	1577.13	1463.22	1306.01	985.831	1203.39
XP_011248809	Zscan18	28.1591	52.1692	33.8451	0	17.3725	0
NP_035929	Cdc6	105.284	113.548	102.409	57.4218	38.936	84
XP_011242154	Gen1	21.3406	40.4063	27.6115	9.6145	11.722	8.7555
NP_001288297	Cdkn2c	50	43	74.5	23.5	16	24.5
NP_031697	Cdkn2c	50	43	74.5	23.5	16	24.5
XP_017175985	LOC108168959	213	214	203	157	77	140
NP_032947	Prim1	164	218	258	109	80	130
NP_079915	Cenpm	8.52643	13.5739	4.93495	0	0.819494	0
XP_006520500	Fbln1	0	1	0	11.4739	11.2169	4
XP_017175860	Ppip5k2	35.9631	67.9317	60.3303	0.000757218	27.1384	1.96174
NP_775561	Cilp	2	4	0	29	18	12
NP_776287	Fam83a	26.0271	31.3031	17	39.8743	40.4094	38
NP_001189374	Mapk8ip1	161.156	157.487	78.738	49.666	31.2855	0
NP_001258363	Haghl	9.72432	13.1221	18.0333	0	0	6.75581
NP_034483	Gsg2	178.5	233	262	133	62	130
XP_006499561	Atp8b4	65.6907	131.831	88.03	37.3062	0	18.6764
NP_083893	Casc5	134.667	212.333	293.333	40.6667	45.3333	71
XP_006500439	Casc5	134.667	212.333	293.333	40.6667	45.3333	71
XP_006500440	Casc5	134.667	212.333	293.333	40.6667	45.3333	71
XP_017172172	Kmt2d	241.022	249.54	160.46	120.714	108.916	48.9424
NP_666106	Abi1	97.3567	64.8891	0.0076098	245.418	306.574	154.086
NP_080129	Dsn1	91	100	104	79	42	56
NP_663409	Nr1d1	365.5	349.348	404.14	872.719	742.044	533.969
XP_011239175	Vps37d	6.7356	2.2234	7	0	0	0
XP_006507476	Mki67	851.649	533.723	786.462	385.276	218.437	402.26
NP_031734	Cit	83.1247	108.824	176.689	42.4747	0.0165632	10.3072
XP_006530204	Cit	83.1247	108.824	176.689	42.4747	0.0165632	10.3072
XP_017174939	Ecm1	120.008	131.018	159.028	274.233	221.17	191.263
XP_011237447	Gapvd1	27.0956	63.6512	59.3366	0.954947	8.02e-06	17.2971
XP_017174684	Gapvd1	27.0956	63.6512	59.3366	0.954947	8.02e-06	17.2971
XP_017174685	Gapvd1	27.0956	63.6512	59.3366	0.954947	8.02e-06	17.2971
NP_598547	Smc4	504.5	849	897	344	273.5	342.5
XP_006502109	Smc4	504.5	849	897	344	273.5	342.5
NP_001297588	Igfbp2	10.0986	5.63796	0.912305	17.2848	24.1384	14.7765
NP_038555	Gdf7	89.4731	171.45	163.143	58.3313	45.6063	3.6096
XP_006527851	Plxnb3	46.815	54.9701	42.0402	27.0278	36.9809	23.998
NP_001157025	Ap4b1	20.0168	15.0254	9.44777	4.791	0	4.57934
NP_001290160	Folr2	5.14444	3.25043	3.80158	21.315	10.8971	13.0192
NP_001290168	Folr2	5.14444	3.25043	3.80158	21.315	10.8971	13.0192
NP_032061	Folr2	5.14444	3.25043	3.80158	21.315	10.8971	13.0192
XP_006519419	Scel	10.3979	3.19619	9.2338	0	0	0
XP_006527553	Cnnm2	66.1388	73.6038	37.8472	5.87043	0	28.7687
NP_033106	Rpl26	5083	3696	4743	6182	5779	5985
XP_006531263	Adgrg3	24.6473	35.2814	30.0946	15.7547	13.3556	21.355
XP_006497238	Rps6kc1	0	0	7.15154	26.6898	11.3104	26.4539
NP_056602	Hist1h1e	2990.35	2197.65	3223.02	1913.25	1352.11	1573.6
XP_011246860	Wwox	0	7.73132	8.69278	21.4056	18.6532	13.3347
NP_062767	Tspan3	364	428	364	653	519	507
NP_081608	Rpf1	72.6967	81.6896	70.1483	45.7514	63.3635	45.3378
XP_006505236	Tmem209	21.3764	9.74533	17.9529	4.86349	5.47983	2.35307
XP_017177255	Tmem209	21.3764	9.74533	17.9529	4.86349	5.47983	2.35307
NP_766412	Ccdc14	54.9702	40.0252	50.2126	24.8104	9.80771	31.5106
NP_780571	Card11	629	751	699	328	109	483
NP_081555	Mettl18	15.5	15	12	11	7	8
XP_006497046	Mettl18	15.5	15	12	11	7	8
NP_001280686	Dctn6	44.6058	51.2184	58.5902	33.2755	39.7165	36.3552
XP_011244550	Ehmt2	173.662	198.845	241.898	145.034	131.769	130.212
NP_001157238	Wdr90	716	987	963	646	497	537
NP_081367	Nup35	118	120	139	103	102	104
XP_006520756	Tns2	32.1298	25.6747	15.5238	9.47481	7.09228	0
NP_001028490	Cog7	399.806	333.278	416.256	543.909	486.627	466.266
NP_778168	Arhgap44	11.6817	0.0928513	21.2566	30.9629	42.5116	31.7373
XP_006528574	Nxf7	5.5	0	2.5	17.8009	11	9.5
XP_006528575	Nxf7	5.5	0	2.5	17.8009	11	9.5
NP_062287	Selenbp2	8.704	11.0553	8.72316	13.1688	15.9417	12.5287
XP_006511896	Usp19	20.4256	57.7541	81.4302	200.805	109.938	173.915
NP_001104486	Nav2	306.342	281.035	324.718	189.426	86.5549	216.857
NP_573500	Apcdd1	1	2	0	12	14	28
XP_011243061	Ube2e1	5.36568	17.0436	11.6541	41.2248	25.9061	26.9985
NP_001304314	Prdx2	462	423	401.5	673.5	543	542.5
NP_035693	Prdx2	462	423	401.5	673.5	543	542.5
NP_796165	Sycp2	57.1307	110.82	89.5	28.2443	39.5	28.7484
XP_017174510	Sycp2	57.1307	110.82	89.5	28.2443	39.5	28.7484
XP_011246353	Hmcn1	0	3	0	9.30553	17.6498	8
NP_001076587	Terf2	77.3034	97.0743	95.2458	68.967	63.9573	48.7158
XP_006498881	Kif16b	32.2452	34.9186	38.5417	26.2624	21.6135	29.1618
XP_006510644	Anln	137.596	106.214	135.442	0	83.6322	30.1507
XP_006538711	Pik3cd	0.00151091	28.6412	1.22e-05	47.5032	36.7554	45.7918
NP_035251	Plk1	342	229	275	131	100	191
XP_017177422	Adam8	355.83	167.823	357.966	72.9398	23.3519	107.741
XP_011239439	Braf	19.7349	25.7697	32.7688	11.3353	15.1651	6.56684
XP_017175948	Pum1	70.1471	50.8994	76.3589	88.4973	119.954	122.139
XP_017167704	Sirt2	50.7175	60.294	66.3454	37.7962	36.0817	46.8852
NP_034967	Map6	9.87298	11.0776	9.79374	15.9017	12.276	16.5817
NP_031515	Arntl	7.18868	9.86509	24.788	90.2393	39.5822	91.2318
XP_011245975	Hdac8	21.0417	35.4584	24.8582	15.5112	8.08625	7.00514
NP_035647	Sycp3	7	8	16	18	23	23
NP_001277499	Ralgps1	11.7591	22.2137	25.8346	0	4.40319	7.69251
XP_011240850	Cep295	20.333	26.6445	29.2325	0	0	16.1876
XP_006499846	Nol4l	3.79e-06	0	0	11.2683	16.7053	5.19092
XP_006499847	Nol4l	3.79e-06	0	0	11.2683	16.7053	5.19092
NP_079557	Lyar	19.8571	18.7143	21.5714	12.7143	11.7143	17.1429
XP_006503822	Lyar	19.8571	18.7143	21.5714	12.7143	11.7143	17.1429
XP_006503823	Lyar	19.8571	18.7143	21.5714	12.7143	11.7143	17.1429
XP_006503824	Lyar	19.8571	18.7143	21.5714	12.7143	11.7143	17.1429
XP_006503825	Lyar	19.8571	18.7143	21.5714	12.7143	11.7143	17.1429
XP_006503826	Lyar	19.8571	18.7143	21.5714	12.7143	11.7143	17.1429
XP_006503827	Lyar	19.8571	18.7143	21.5714	12.7143	11.7143	17.1429
XP_006507464	Apobr	15.0052	24.8391	26.6321	10.2538	0	8.40565
NP_001074476	Zfp382	45.4127	24.9221	33.5462	15.372	13.8126	15.2965
NP_001289580	Ifi203	140.178	148.178	116.37	58.969	2.24745	84.163
NP_573499	Glcci1	131.238	195.001	180.895	91.6437	59.6759	111.548
XP_006530931	Ndrg4	0	3.00026	5.57408	11.7526	20.1542	10.6182
NP_783574	Adamts2	19	10	13.5062	65	73	32
NP_001020529	Klc1	0	0	0	17.5651	6.58519	22.4127
XP_006511026	Tfdp2	2.81404	0	8.60879	66.0371	25.5824	40.0868
NP_001162129	Ccdc127	6.28174	3.74422	19.119	37.3492	28.1971	24.3929
NP_598776	Fbxw11	651.474	845.008	881.325	589.183	356.978	459.744
XP_017175822	Srsf4	184.449	166.626	228.036	143.279	121.275	114.085
XP_017175823	Srsf4	184.449	166.626	228.036	143.279	121.275	114.085
NP_001156818	Cdc42ep4	9.34845	11.1807	10.9734	19.2458	18.2778	13.2501
NP_064390	Cdc42ep4	9.34845	11.1807	10.9734	19.2458	18.2778	13.2501
XP_006533880	Cdc42ep4	9.34845	11.1807	10.9734	19.2458	18.2778	13.2501
XP_006533881	Cdc42ep4	9.34845	11.1807	10.9734	19.2458	18.2778	13.2501
XP_006533882	Cdc42ep4	9.34845	11.1807	10.9734	19.2458	18.2778	13.2501
XP_017170175	Cdc42ep4	9.34845	11.1807	10.9734	19.2458	18.2778	13.2501
NP_780703	Zfp367	122.408	83.6082	127.961	20.5439	28.7471	72.8367
XP_006505128	Impdh1	169.698	311.598	182.455	518.584	428.388	358.342
XP_006514908	Mtmr3	36.7064	79.3166	35.7475	132.855	89.5813	119.526
XP_006514909	Mtmr3	36.7064	79.3166	35.7475	132.855	89.5813	119.526
NP_079730	Ing5	111.836	107.019	120.434	95.102	89.506	101.99
NP_835587	Hist2h3b	880.477	418.93	550.758	133.461	86.75	219.99
NP_001297647	P2rx4	151.827	235.12	187.755	79.2399	80.4095	128.307
NP_083884	Fam209	33	38	37	28	28	32
NP_082518	Htatsf1	231.5	219	227.5	213	189	198
NP_083647	Htatsf1	231.5	219	227.5	213	189	198
XP_011238887	Snrnp40	56.827	76.2926	49.1716	37.0546	18.3443	30.6674
XP_006515492	Mta1	79.7278	135.71	138.884	0	38.8347	59.643
XP_011247582	Larp1	194.279	236.229	307.428	380.213	334.44	397.543
XP_017170286	Larp1	194.279	236.229	307.428	380.213	334.44	397.543
XP_006539515	Spred3	18.5586	37.279	13.0771	60.7426	55.2957	42.4989
NP_082666	Anln	347.192	253.979	418.682	185.008	98.2756	186.534
XP_011239590	Cd27	13.199	21.3511	14.2718	7.07026	4.97538	9.06273
NP_031611	Anxa2	2045.5	1673.5	1632	3314	2293	2958
XP_006510859	Anxa2	2045.5	1673.5	1632	3314	2293	2958
XP_017169957	Heatr6	25.0579	11.883	38.4489	0	0	0.00542446
XP_006523278	Zdhhc14	80.7247	83.1703	93.1858	56.2843	56.0958	74.36
NP_001129200	Sh3kbp1	27.2587	22.7341	6.97395	89.8413	43.1794	69.8594
NP_035211	Piga	44.4888	49.9654	62.9044	36.5885	33.8153	31.2323
XP_017173917	Piga	44.4888	49.9654	62.9044	36.5885	33.8153	31.2323
XP_017169412	Tle2	0	0	0	18.6073	10.0396	30.9745
NP_776110	Pamr1	12	17	15	51	27	57
NP_001277305	Camk1d	66.3345	50.1223	80.1134	41.4171	12.5184	24.3693
NP_835493	Hist1h2ag	121.575	82.2413	78.9225	27.2196	7.89387	55.9232
NP_001272912	Banp	80.5576	122.82	116.39	34.088	46.3273	71.406
XP_017171768	Odf2	99.9468	150.484	133.777	78.1231	81.0434	50.0286
XP_006537975	Dcaf10	97.7943	116.971	70.5409	45.9729	38.4138	57.823
XP_006533937	Arhgap23	6.07146	51.5376	2.28028	81.4377	65.0737	75.144
XP_006511090	Tle3	44.6589	19.4669	58.3093	162.583	83.3569	126.82
NP_001161942	Emc6	49.25	50	62	73	64.75	76.75
NP_079594	Emc6	49.25	50	62	73	64.75	76.75
NP_001153337	Kctd18	9.23596	24.1952	11.7778	0	1.16e-06	0
NP_998780	A530032D15Rik	110.197	105.382	86.9473	35.6428	21.9367	74.932
XP_006534968	Gak	455.296	434.735	500.289	316.838	221.862	375.344
XP_006500102	Tanc1	32.917	40.7175	0	69.2706	73.6577	59.4104
XP_011241596	Ank3	0	3.87002	12.434	49.2401	23.4108	28.6448
NP_036107	Slc27a1	0.000200064	17.8782	0.0001054	30.6848	80.5864	59.3897
XP_006509736	Slc27a1	0.000200064	17.8782	0.0001054	30.6848	80.5864	59.3897
XP_006509737	Slc27a1	0.000200064	17.8782	0.0001054	30.6848	80.5864	59.3897
XP_006509738	Slc27a1	0.000200064	17.8782	0.0001054	30.6848	80.5864	59.3897
XP_006509739	Slc27a1	0.000200064	17.8782	0.0001054	30.6848	80.5864	59.3897
NP_067263	Tyms	181.521	169	195	71.6985	73.8432	147.077
XP_006539315	Mib2	409.861	352.873	357.071	278.736	240.775	318.132
NP_077207	Kif23	184.678	137.323	249.235	25.258	63.943	100.689
XP_006513227	Cirbp	28.4028	26.6525	28.6943	21.9746	11.3901	7.32445
XP_006513228	Cirbp	28.4028	26.6525	28.6943	21.9746	11.3901	7.32445
NP_997406	Rpl23a	3535	3311	3556	4453	4133	3802
XP_017172781	Nfya	57.4423	48.5344	47.1404	22.6542	0	32.1958
NP_076333	Jam2	5	9	5	20	16.7445	11
NP_001036030	Wsb1	39.1137	31.5272	51.219	21.5499	22.5512	10.556
XP_006534580	Wsb1	39.1137	31.5272	51.219	21.5499	22.5512	10.556
XP_006531747	Pola2	10.1043	14.761	12.5594	8.02498	3.18855	0
XP_006538172	Dnajb5	40.3849	6.38642	0.949215	66.4989	50.6615	58.5837
XP_006515347	Pum2	25.4603	116.055	65.5487	310.016	203.063	172.575
NP_001277926	Sema6d	82.1662	63.4309	61.0985	51.1344	26.37	27.8341
NP_954708	Sema6d	82.1662	63.4309	61.0985	51.1344	26.37	27.8341
XP_006526121	Tmem241	16.7133	13.7555	13.6508	0.138134	0.895092	10.1937
NP_996257	Churc1	85	94	89	143	109	118
NP_001278051	Epb41l1	249.402	221.98	175.196	529.886	404.842	325.809
NP_663452	Alg12	29.83	20.8079	28.0743	16.2616	6.96915	15.7701
NP_035581	Sphk1	11.9006	52.3197	22.0777	99.2096	114.884	62.7499
NP_079653	Ska2	13.5	18	17.5	11	12.5	10
NP_001012400	AU022252	55.8719	51	44.4188	92.603	81.5368	64
NP_075699	Anp32e	580.478	520.051	708.807	426.842	348.371	433.553
XP_006498083	Pnpla7	212.757	172.702	201.22	161.413	126.734	107.488
NP_038566	Cdca3	56	34.3333	61	16	16	29.3333
XP_006505627	Cdca3	56	34.3333	61	16	16	29.3333
XP_017176884	Cdca3	56	34.3333	61	16	16	29.3333
XP_017169788	Itgae	20.2303	31.4963	36.3387	13.2035	4.40661	14.7884
XP_017176781	Chd4	0.787297	0.4513	0.812919	72.5325	120.48	215.783
XP_006533146	Llgl2	30.8277	0	11.7889	111.289	109.72	46.1874
XP_017175078	Cspp1	178.549	201.036	280.133	138.58	98.9202	98.0436
XP_006512433	Osbpl10	30.4172	72.2205	35.7926	1.63e-06	8.66676	0
XP_006525103	Mdga1	30	22	36	39.8454	46	46
XP_006519751	Bora	30.898	40.3294	45.6377	21.2779	12.6657	26.3074
NP_032323	Hsf2	23.2697	31.2641	46.5638	57.1609	84.7982	102.543
NP_033839	Arnt	167.834	178.296	155.914	396.791	238.497	312.178
NP_001153107	Rbm18	9.22486	7.39332	4.32479	0	0	3.38523
NP_766555	4930503L19Rik	123.704	91.2762	88.7336	36.7143	69.042	56.7274
NP_081091	Upk1a	8	7	4	10	11	10
NP_084300	Prr15	13	12	6	22	20	16
XP_006521394	Zfp740	88.0256	80.2035	102.805	68.7046	68.8542	69.7089
XP_006539136	Spen	541.661	307.139	571.089	261.281	7.10031	0.00189522
NP_001277946	Pdxdc1	163.103	33.2022	5.95393	270.033	190.748	280.968
XP_006533901	Fmnl1	840.181	761.086	886.917	478.943	286.166	651.366
XP_017172864	Nup214	21.7039	32.5579	22.1841	15.2744	9.64588	13.8794
XP_017170598	Ttll5	21.9925	40.6908	37.7506	18.7166	1.32e-07	0
NP_032347	Id3	30	40	40	46	54	49
XP_006516269	Wdr20	29.2661	20.1249	35.8448	16.5358	7.43242	10.6773
XP_011242472	Wdr20	29.2661	20.1249	35.8448	16.5358	7.43242	10.6773
XP_017176700	Tmem156	41.0154	51.6441	48.6444	37.2794	17.8051	21.4702
XP_006504903	Cdk8	21.9773	38.7294	26.3062	59.5781	42.9572	50.9831
NP_001181994	Phactr2	73.4249	64.8176	108.29	31.9802	17.6946	46.6105
NP_598510	Emc7	440.593	404.643	435.66	563.94	494.478	484.597
NP_031582	Bmp6	3.04993	2	3.04645	7.05347	6.1414	4.04782
XP_011244059	Gsdmc4	12.2751	0	6.88669	17.0562	17.3941	19.4048
NP_081491	Tmem147	359	321	390	408	437	451
NP_031997	Ezh2	340.416	498.451	446.427	272.762	193.221	290.802
XP_006515638	Numb	186.196	197.425	182.367	343.883	232.216	306.022
XP_006522633	Hacd2	0.00113214	7.77436	1.60633	10.387	10.4447	11.39
XP_006522634	Hacd2	0.00113214	7.77436	1.60633	10.387	10.4447	11.39
NP_034350	Fkbp5	428.5	363.5	361.5	580.5	451	566
NP_082891	Dppa2	3	2	2	7	4	5
XP_006528432	LOC102634296	1924	2371	2318	1818	1279	1508
XP_006531337	Tmem208	24.3753	21.0366	22.7878	33.6222	30.0581	26.4099
NP_666242	Hnrnpa3	289.395	216.033	351.578	164.513	150.516	165.426
NP_932758	Hnrnpa3	289.395	216.033	351.578	164.513	150.516	165.426
XP_017169453	Nt5dc1	0.10643	13.0972	3.11167	24.1933	19.822	38.9076
NP_660104	Pex16	225.779	162.51	199.076	279.691	241.538	275.877
NP_001032826	Arnt	561.556	814.413	825.599	461.189	463.897	453.629
NP_835494	Hist1h2ae	693.042	418.2	559.089	153.308	152.41	360.43
XP_017169587	Mcm9	54.7133	43.7649	68.0691	24.5325	31.8617	35.9553
NP_080710	Rbm18	99.7751	111.607	121.675	150.548	131	134.615
XP_006520649	Pcbp2	106.694	50.8339	161.125	0.0196576	12.7768	6.4e-06
XP_006521358	Zcrb1	23.0464	37.0918	8.70798	46.8741	49.0878	52.3193
XP_006526016	Sap130	0	0	2.16e-07	139.985	57.9876	59.626
NP_031683	Cd9	2012	2231	1998	3481	3326	2480
NP_001025008	Pik3cd	60.0425	74.135	70.4527	32.8975	0.00170851	42.6523
NP_001157521	Pik3cd	60.0425	74.135	70.4527	32.8975	0.00170851	42.6523
XP_006538712	Pik3cd	60.0425	74.135	70.4527	32.8975	0.00170851	42.6523
XP_006532951	Chd3	184.661	268.267	298.606	144.337	146.438	135.259
XP_006535864	Phtf2	0	0	0	6.18956	16.7051	22.5169
NP_758480	Sfswap	594.488	534.126	554.871	505.008	406.339	387.629
XP_017177421	Adam8	179.664	82.7088	224.874	31.2956	8.36301	39.7522
XP_006498084	Pnpla7	41.2379	44.8198	31.3205	16.6385	25.4946	3.48813
NP_001070661	Abi1	677.701	595.197	681.196	552.958	400.785	500.233
NP_666347	Ercc6l	159	96	180	71	50	67
NP_612174	Trpm2	448.395	531.949	443.765	305.321	372.219	200.609
NP_001288557	Usp15	219.956	241.667	271.566	155.395	77.1695	178.036
NP_001159415	Nsun6	47.2677	19.9877	61	0	6.51827	5.83178
XP_011246182	Apex2	0	3.62136	0	14.3356	9.73956	5.72669
NP_938034	Tex2	179.282	210.696	185.783	228.685	221.423	252.46
XP_006533206	Tex2	179.282	210.696	185.783	228.685	221.423	252.46
XP_006533207	Tex2	179.282	210.696	185.783	228.685	221.423	252.46
XP_006533208	Tex2	179.282	210.696	185.783	228.685	221.423	252.46
XP_006533209	Tex2	179.282	210.696	185.783	228.685	221.423	252.46
XP_006533210	Tex2	179.282	210.696	185.783	228.685	221.423	252.46
NP_766166	Mis18bp1	126	154	212	77	61	96
XP_006528835	Kdm5c	369.31	330.427	293.594	237.658	255.506	272.584
NP_001104545	Cdc25b	230.289	192.913	161.052	82.957	43.1598	137.605
XP_006510628	9530077C05Rik	13.3059	7.88689	24.2321	0	0	0
XP_006524849	Lpin2	223.646	246.1	195.968	140.205	53.2944	150.443
NP_001156376	Mdm1	0	0.305791	4.32558	7.39543	20.1489	14.317
XP_011248085	Lmbr1	4.27993	5.82253	11.914	0	0	0
XP_006538964	Epb41	2.10785	0	3.23744	29.744	34.7634	74.3839
NP_112460	Sp6	2.5	1.5	0.5	3.5	7.5	8
XP_006534594	Sp6	2.5	1.5	0.5	3.5	7.5	8
NP_062275	Pabpn1	695.195	756.006	619.049	578.978	394.164	467.72
NP_031685	Cdk1	283	245	376	84	93	206
NP_001033681	Glrx2	14.1676	5.51965	13.7126	27.2305	21.9936	18.9981
NP_075992	Ing2	178	182	192	160	100	123
XP_006531240	Galns	75.2261	59.1268	83.2558	22.6523	43.6905	49.5425
NP_852055	Mustn1	7	5	5	4	3	3
NP_067322	Gsdma	1	0	0	2	2	4
XP_011237102	AI607873	91.1663	83.8523	173.995	0.302455	44.2539	0
NP_080545	Get4	485.823	404.531	462.773	392.516	323.343	320.786
NP_001106863	Cd247	13.2915	23.8933	25.5576	8.91244	8.04451	9.51498
XP_017169850	Ncor1	50.7321	12.471	0.20151	84.1154	123.683	197.011
NP_942589	Zbtb12	30.6087	30.6667	31.2556	27.3333	20.6667	25.6667
XP_006523953	Zbtb12	30.6087	30.6667	31.2556	27.3333	20.6667	25.6667
XP_017171692	Dlg5	23.2406	24.8991	14.8073	7.31665	0	11.9085
NP_666360	Cchcr1	109.526	122.411	99.0028	90.4965	54.409	69.3552
NP_001009978	Pde1a	5	1.56651	2.82145	0	0	0
XP_017176501	Abcb9	64.1905	77.5238	65.9493	32.2344	9.94379	50.0575
XP_017174007	Taf1	99.3829	262.961	191.55	0.000117148	66.0457	0
NP_783592	Hist1h2af	683.628	340.471	598.055	77.8473	58.3933	293.32
XP_017175029	Nudt6	14.2579	8.31309	0	38.0071	23.9159	21.8192
XP_006534789	Dgkq	56.7923	27.6494	33.8272	2.13e-08	4.7377	17.5141
NP_035172	Pcbp2	75.0239	140.841	135.949	1.39e-05	66.3308	0.00246319
XP_011241037	Fam63b	21.3964	31.2704	17.8655	68.5426	39.3204	50.4259
NP_620097	Tmlhe	49.252	67.8108	71.126	113.442	95.6591	83
NP_001104548	Uhrf1	319.574	319.509	412.123	137.354	108.537	267.253
NP_035061	Uhrf1	319.574	319.509	412.123	137.354	108.537	267.253
NP_001035549	Shroom4	24.1876	24.1277	27.3837	116.709	96.25	49.1985
XP_006519024	Arhgap22	71.0455	103.675	52.0403	8.23813	39.2816	0.00971803
NP_001288134	Dpep2	147.125	129.335	182.603	437.895	257.454	295.527
XP_006533799	Exoc7	0	65.6216	25.3129	80.6799	94.9102	104.196
NP_001012324	Ecm2	22	44	26	8.48564	12	7.18293
NP_058596	Cav2	66	44.2631	95.7295	110.807	115	134.244
NP_034726	Kcna7	9	14	13	24	17	19
XP_011237301	Gm37416	123.527	185.554	210.456	86.7708	100.869	88.0818
NP_033219	Slbp	289.279	345.174	379.126	235.819	196.238	269.219
XP_006495573	Sulf1	0	0	0	1.66269	2.8	0.831942
XP_006495574	Sulf1	0	0	0	1.66269	2.8	0.831942
XP_006495575	Sulf1	0	0	0	1.66269	2.8	0.831942
XP_006495576	Sulf1	0	0	0	1.66269	2.8	0.831942
XP_006495577	Sulf1	0	0	0	1.66269	2.8	0.831942
XP_011246139	A830080D01Rik	79.1881	122.186	104.83	66.8779	60.4828	61.478
NP_115999	Sptbn4	8.99906	19.9978	10.9973	0	4.99915	0
XP_006526012	Sap130	376.989	284.069	373.537	175.937	176.469	272.317
NP_001192012	Scarb1	29.8024	33.812	36.8927	9.82538	23.8127	0
NP_940817	Eid2	17	12	13	32	22	22
NP_084042	Dtl	217.581	311.006	318.007	119.296	87	202.432
NP_067305	Acp1	84.0889	93.642	100.618	112.39	112.685	104.37
XP_006540442	Smg9	19.6846	46.4895	45.2988	100.379	76.8042	63.3244
XP_017174005	Taf1	4.74924	9.58737	21.7335	53.1799	34.1945	29.8624
XP_011244757	Cchcr1	46.731	70.2044	50.9622	34.0576	33.1248	33.7714
XP_006510752	Thyn1	21.0572	26.5601	33.5478	38.3865	45.4439	37.7907
XP_011237074	Ppox	54.78	65.8036	77.999	36.1704	46.2091	46.5791
XP_011237075	Ppox	54.78	65.8036	77.999	36.1704	46.2091	46.5791
NP_001156491	A430005L14Rik	19.7126	16.4273	15.3394	12.1301	0	0
NP_076144	Trim29	15	8	10	27	64	43
XP_017172033	Chadl	8.56768	0	0	9.64617	18.3708	19
XP_006512742	Adgrg6	155.307	107.304	127.863	238.72	273.456	174.816
XP_017173959	Usp11	31.5417	19.4388	24.5477	14.9375	0	8.99201
XP_017174092	Atg4a	52.3501	35.259	52.0529	25.8109	32.4862	23.7261
XP_006510677	C2cd2l	96.6922	61.8806	120.304	142.208	148.391	181.608
XP_011238771	Orc1	57.5143	58.9221	54.2556	50.0958	32.4885	32.6221
NP_035364	Rad51	90	92	130	39	17	70
XP_006498140	Cntrl	424.229	550.899	530.075	400.143	212.356	255.242
NP_031445	Adrb1	266	293	310	236	109	165
NP_032449	Kcnd1	53	36	52	33	19	26
NP_796249	Amigo3	172	193	184	152	84	123
XP_011249120	Furin	188.459	170.231	216.251	153.093	87.508	120.898
XP_011249121	Furin	188.459	170.231	216.251	153.093	87.508	120.898
XP_011249122	Furin	188.459	170.231	216.251	153.093	87.508	120.898
XP_011249123	Furin	188.459	170.231	216.251	153.093	87.508	120.898
XP_011249124	Furin	188.459	170.231	216.251	153.093	87.508	120.898
XP_011249125	Furin	188.459	170.231	216.251	153.093	87.508	120.898
XP_011241143	Rnf111	41.5017	45.6186	101.345	7.00586	2.33833	0.59424
NP_001074647	Adgrf5	0	0	0	23.1788	6.39797	15
XP_017171566	Atp8a2	0	0	0	19.1207	19	5
NP_084358	Hist3h2ba	16	13	25	9	4	5
XP_017169676	LOC108167827	8.92683	10.2791	15.7716	18.2966	21	17.3645
XP_006525130	1700001C19Rik	0.222727	0	1.61967	1.88063	4	4.15487
XP_006503995	Cpeb2	459.772	332.799	396.137	242.608	199.507	306.02
NP_444377	Pcdhb22	16	21	11	28	23	27
XP_006504196	Klhl5	0.133832	93.8416	86.2578	381.765	158.112	389.192
NP_001153081	Lrrc57	82.7061	95.1023	101.498	74.8068	71.8792	78.7998
NP_062615	Stmn1	492	375	716	189	133	272
XP_017172705	Birc6	454.956	731.217	455.597	330.805	121.716	59.7367
NP_035901	Ikzf3	140.271	244.548	242.386	95.3232	39.7993	115.17
XP_011236786	Actr1b	37.225	94.7297	82.6704	18.3336	10.874	22.1938
NP_001297013	Dpm1	6.55217	0	0	8.99045	16.3851	22.781
NP_031760	Col4a3	5	1	3	6	7	7
NP_081788	3830417A13Rik	3	5	4	15	12	7
NP_849201	Hs3st3a1	22.678	35.6502	27.4206	19.1036	12.4348	15.2878
NP_035234	Prkce	75.5985	75.2071	29.9351	104.895	103	118.105
XP_011245234	Mex3c	92.6073	118.532	76.3548	58.6635	33.7315	59.1233
NP_444311	Fancg	59.0916	64.8788	74.4879	51.8502	31.9517	46.5613
XP_006538190	Fancg	59.0916	64.8788	74.4879	51.8502	31.9517	46.5613
XP_006538191	Fancg	59.0916	64.8788	74.4879	51.8502	31.9517	46.5613
NP_033490	Ucp3	1	3	5	16	12	7
NP_075783	Ndc80	205	216	344	83	52	148
NP_001171129	Mrpl15	147.076	113.65	146.918	167.165	168.49	178.981
XP_006539251	Mad2l2	2.30991	2.45929	9.18244	24.8341	11.8149	17.4341
NP_941007	Ska3	37.4264	37.6005	58.8029	25.5733	19.6928	21.972
NP_001129541	Ldha	9318	7499	7419	10461	9561	10592
NP_032907	Plxna1	1496	1281	1202	2608	1757	2034
NP_776095	Tmem87a	0.000933161	0	0	89.4345	105.982	26.1572
NP_001004140	Ckap2	70.7184	131.826	96.1386	43.7568	26.3241	52.575
NP_001074654	Flnc	1.02e-05	45	2.72e-05	95.9982	115.107	51.996
XP_006496508	Ptprn	12.1473	12.6601	19.1817	23.7155	21.7566	20.6667
XP_011236979	Ptprn	12.1473	12.6601	19.1817	23.7155	21.7566	20.6667
XP_011236980	Ptprn	12.1473	12.6601	19.1817	23.7155	21.7566	20.6667
NP_061271	Syt7	4	0.57883	2.05785	6.28774	4.52109	6.44973
NP_001177337	Gas2l1	191.086	138.218	157.295	262.469	215.727	212.16
NP_653146	Gas2l1	191.086	138.218	157.295	262.469	215.727	212.16
NP_083442	Uhrf1bp1l	839.879	936.372	1005.15	1154.11	1040.28	1120.25
NP_001276505	Tsc1	81.2549	87.2288	80.7226	109.748	91.5813	99.3524
NP_033925	Capns1	691.599	572.238	703.718	1093.64	807.248	915.964
XP_006539551	Capns1	691.599	572.238	703.718	1093.64	807.248	915.964
XP_017170723	Zc3h14	0	19.3401	10.3019	33.5539	23.3357	30.5233
NP_001277737	Haus2	10.9891	9.81798	13.7321	15.7651	21.2386	16.425
XP_006528804	Msl3	59.2269	34.0011	73.1612	84.1605	130.011	112.001
XP_006531855	Ppp6r3	141.195	160.99	170.563	61.6267	106.477	122.156
XP_017168089	Myo9b	1439.97	1685.55	1743.18	1201.71	555.59	1102.24
NP_058541	Acrbp	23.9252	19.7826	20.4167	15.9881	5.52627	12.4019
XP_006515833	Pacs2	174.179	240.314	252.881	143.751	146.436	79.2879
XP_006506352	Zfp786	5.65e-06	0	0	13	7	4
XP_017168280	Mcph1	14.933	9.03546	21.6458	5.28127	2.48702	4.00264
XP_017170129	Specc1	136.063	126.54	80.7464	215.738	190.516	156.547
NP_001025153	Sec23ip	603.205	529.26	564.616	834.192	639.77	801.503
NP_937760	Abi2	76.0519	82.9671	82.1222	137.696	105.075	102.668
NP_001030305	St3gal5	83.7032	146.782	83.3865	214.13	171.496	164.843
XP_011248735	Dmpk	0	3.05631	13.4211	24.542	31.203	15.6428
NP_001277596	Chac2	1.58652	2.24676	5.41834	15.6114	7.27788	10.7155
NP_001273502	Ehmt2	275.358	192.025	240.604	176.899	151.109	140.549
NP_033532	Vegfc	15	8	10	19	28	19
XP_006518802	Sorbs3	40.7617	28.8394	59.7255	1.89e-08	22.8401	0.000741294
XP_006534073	Luc7l3	170.941	263.151	230.372	155.353	113.933	127.61
XP_006534074	Luc7l3	170.941	263.151	230.372	155.353	113.933	127.61
XP_006497659	Mmadhc	105.408	111.147	107.848	89.6843	49.5498	77.0987
NP_001161720	Rmi1	97.3333	96	127.333	80.6667	58.6667	72.3333
NP_083180	Rmi1	97.3333	96	127.333	80.6667	58.6667	72.3333
XP_006517483	Rmi1	97.3333	96	127.333	80.6667	58.6667	72.3333
XP_006507876	Tenm4	0	14.9016	0	46.1894	19.3871	32.3064
NP_001070977	Tnfrsf9	12.6149	16.3025	17.4085	8.29676	4.21705	11.2506
NP_035742	Tnfrsf9	12.6149	16.3025	17.4085	8.29676	4.21705	11.2506
XP_011248530	Tnfrsf9	12.6149	16.3025	17.4085	8.29676	4.21705	11.2506
NP_073725	Svep1	6	2	20	74	30	49
XP_006518893	Wdhd1	365.04	463.406	539.316	291.409	187.729	314.112
NP_057890	Chek2	41.3643	35.7106	45.38	33.9058	21.2523	25.1237
XP_006535132	Chek2	41.3643	35.7106	45.38	33.9058	21.2523	25.1237
XP_006535133	Chek2	41.3643	35.7106	45.38	33.9058	21.2523	25.1237
XP_006538596	Ephb2	5	7	2	8	11	12
XP_011241399	Syne1	28.4136	19.8053	42.9346	12.3199	0	9.39395
XP_006523587	Birc6	116.35	251.284	285.686	64.0053	76.8942	2.78e-06
XP_006507508	Ppfibp2	14.1087	38.0918	32.0188	86.8318	62.7898	50.4553
NP_062510	Htra1	14	5	14	39	50	22
NP_631884	Hlcs	113.842	121.674	108.878	103.016	72.4962	79.229
NP_001272931	Scyl3	18.165	0	0	47.2827	75.9069	29.0429
NP_932105	1190005I06Rik	4.67346	5	4.91612	3.64443	0	0
XP_006504541	Mlxipl	0	0	1.58575	8.51246	3.89435	3.85338
XP_006541022	Fan1	6.03167	0	5.13208	22.306	9.95306	26.4194
NP_001103785	Kif1a	135.44	119.331	185.167	77.0405	52.674	97.5887
NP_034949	Clec4d	355.814	343.72	339.262	615.877	425.359	674.887
XP_017168976	Cadm1	65.651	62.6778	103.059	43.3164	9.78021	32.0148
XP_017168977	Cadm1	65.651	62.6778	103.059	43.3164	9.78021	32.0148
NP_835507	Hist1h2bm	445.521	195.223	327.15	88.0751	50.1493	140.343
XP_006500470	Ninl	56.083	36.1431	49.5797	8.30021	10.8452	33.5351
XP_006535333	Ep400	432.541	421.209	504.09	339.894	40.2259	16.9398
XP_011247618	Ypel2	19	16	13	26	20	27
XP_006527379	Fbxl15	18.923	18.8725	12.6609	10.6187	9.23801	3.40278
XP_011237701	Slc20a1	102.58	52.0474	144.116	758.346	447.774	308
NP_032455	Kcnj9	21	14	25	12.5	3	6.5
XP_006496741	Kcnj9	21	14	25	12.5	3	6.5
NP_001167544	Pcbp2	1.1262	2.64937	24.6717	33.6028	52.4145	79.5786
XP_006520648	Pcbp2	1.1262	2.64937	24.6717	33.6028	52.4145	79.5786
NP_001120663	Snx16	22.9608	32.8187	20.2386	12.9321	15.3797	12.7858
XP_006498704	Cbfa2t2	0	26.2691	11.1751	31.8331	49.415	38.1601
NP_001311459	Nck1	39.9059	44.3388	48.8837	144.372	85.1604	83.5841
XP_006503002	Usp1	240.2	124.09	127.363	63.3368	47.8279	0
XP_006496465	Speg	84.3784	82.4782	122.903	52.7929	0	47.1612
NP_598523	Ncapg2	53.3133	74.1439	106.615	36.766	13.0201	31.818
XP_006516412	Ncapg2	53.3133	74.1439	106.615	36.766	13.0201	31.818
XP_006516413	Ncapg2	53.3133	74.1439	106.615	36.766	13.0201	31.818
XP_006516414	Ncapg2	53.3133	74.1439	106.615	36.766	13.0201	31.818
XP_006516415	Ncapg2	53.3133	74.1439	106.615	36.766	13.0201	31.818
XP_006516416	Ncapg2	53.3133	74.1439	106.615	36.766	13.0201	31.818
XP_006516417	Ncapg2	53.3133	74.1439	106.615	36.766	13.0201	31.818
XP_017168053	Fat1	75.9482	99.0284	0	448.192	426.871	161.954
XP_006505065	Met	16.9753	16.1181	14.7909	62.5565	107.194	44.3768
XP_006523999	Slc8a1	38.9125	53.893	66.9538	35.2975	16.7816	18.2859
XP_017168443	Rnf166	11.5065	33.5254	44.401	77.8816	58.1947	57.7662
NP_035651	Sdc4	2630	4218	3880	7829	5992	5151
XP_006528799	Mid1	287.078	433.918	450.593	236.16	77.1134	216.726
NP_033138	S100a10	52.9247	113.162	189.253	254.281	217.896	315.255
NP_081628	Gorasp2	735	736	744	966	796	891
XP_006535766	Kmt2c	147.454	488.149	326.533	66.5145	0.000115176	1.85e-06
NP_035753	Top2a	684.625	792.22	1321.21	175.128	230.338	469.873
XP_006533216	Top2a	684.625	792.22	1321.21	175.128	230.338	469.873
XP_006540248	Gramd1a	515.642	631.376	498.737	364.986	172.343	392.006
XP_006532944	Chd3	29.8533	38.3905	26.7501	23.2449	5.64599	9.7063
NP_001103465	Eftud2	272.046	196.982	198.792	138.932	163.161	117.848
XP_006514510	Smek2	83.6994	103.68	53.8987	251.127	145.252	162.305
NP_034059	Col18a1	138.168	103.518	100.438	270.676	346.717	175.597
NP_032265	Foxq1	25	14	4	73	69	31
NP_032241	Has1	6	7.99999	4.99999	16	14	8.99999
NP_766339	Arhgef10	0.000502916	20.9921	11.8598	34.056	28.4182	27.2377
NP_035276	Pparg	58.8048	48	53.3831	30.6844	31	46
XP_006517413	Fam172a	64.7468	7.24e-08	4.25121	121.167	73.2469	156.103
NP_031533	Atp5k	74	46	55	37	19	32
XP_006512811	Zbtb24	22.7139	11.4	23.3703	0	9.97909	4.75926
NP_001019878	Lrp3	0	0	0	8	12	3
NP_001171352	Mfap3l	13.3333	11	6	19.3333	18.3333	15
NP_001171353	Mfap3l	13.3333	11	6	19.3333	18.3333	15
NP_082032	Mfap3l	13.3333	11	6	19.3333	18.3333	15
XP_006535169	2019-09-11	0	0	0	25.1699	57.4207	20.2828
XP_006502072	Paqr6	7.13108	9.57318	9.16196	28.1582	27.6003	13.3648
XP_006529361	Dis3l2	35.4053	64.4802	18.5448	0	0	0
XP_017175845	Rnf220	59.6104	107.139	55.2004	175.419	146.694	114.149
NP_083240	Snx29	117.064	145.973	183.209	76.9018	92.7894	98.3618
NP_001154928	Cbfb	46.6239	49.5235	66.9919	39.4733	31.453	24.9101
NP_001277992	Elf2	163.456	196.445	259.488	117.686	59.8781	129.356
NP_001294953	Cutal	0	0	0	8.23693	7.62419	1.90869
XP_006515659	Papola	147.712	243.72	205.596	56.0818	75.244	137.672
XP_017173177	Foxp4	8.41001	3.41967	3.58914	16.1231	12.2609	9.41698
XP_011240896	Anln	64.2114	84.7968	120.876	31.9922	0	47.2565
XP_006501122	Arhgef2	168.632	146.647	148.817	137.647	109.2	99.9774
XP_017170702	Prox2	3.84626	5.14688	0	7.77137	8.30104	13.1022
NP_001161141	Spag7	13.2869	15.5908	16.6434	9.22165	2.22781	10.2491
XP_006510051	Dnmt1	675.597	807.701	711.616	643.377	520.665	560.552
NP_001103682	Gigyf2	165.665	237.641	197.406	138.106	89.3373	139.596
NP_473386	Hist2h3c2	1025.33	490.519	828.491	164.973	130.125	435.667
NP_835734	Hist2h3c1	1025.33	490.519	828.491	164.973	130.125	435.667
NP_001157288	Vav1	317.042	618.302	599.626	173.199	68.2639	281.594
NP_758457	Twistnb	190	237	269	168	130	168
NP_001292733	Pank4	28.131	41.9136	26.7559	19.0611	17.9996	9.23241
NP_001295073	Zcchc4	102.283	109.333	81.3038	77.6054	68.3651	68.263
XP_017171570	Tspan14	27.5596	78.9206	112.684	143.458	171.305	138.903
NP_766397	Sacs	36.6077	24.5044	29.8835	17.0363	21.0485	8.75606
NP_032402	Gimap1	26.5	41	27.5	16	8.5	20
NP_787056	Gimap1	26.5	41	27.5	16	8.5	20
XP_006512775	Utrn	443.804	935.726	655.054	307.366	213.133	242.511
XP_006510327	Usp28	48.5813	23.5415	40.1981	0	21.7888	0
XP_006507383	Ctsc	100.535	61.2412	135.613	27.544	0	47.0362
XP_006499556	Wdr76	139.75	195.007	199.842	127.445	118	118.236
NP_080889	Ccdc34	75.7278	66.7304	60.7187	56.7949	52.8975	45.4053
XP_006512312	Zdhhc3	17.4633	47.8493	119.238	212.516	127.926	240.054
NP_955008	Zfp341	24.1845	40.7918	0.000694689	51.3353	71	96
NP_742120	Crocc	251	226.122	197.824	64.378	98	181
NP_035735	Tmpo	277.713	290.386	406.043	213.845	163.177	211.929
XP_006507762	Cog7	107.456	99.7133	80.4132	27.6954	0	69.6015
NP_001107041	Stxbp1	0	54.0859	0	71.3356	91.77	64.2285
NP_783584	Hist1h3c	1190.85	522.88	767.213	144.312	113.725	373.658
NP_001300685	Ophn1	71.0938	48.2428	69.9766	46.0825	30.61	36.7615
XP_006510208	Sidt2	246.064	214.512	241.054	502.049	387.637	308.794
XP_006498465	Arhgap15	386.096	685.497	618.015	319.368	172.138	307.096
XP_017173519	Pnpla7	240.665	182.919	139.529	98.0454	107.1	34.97
NP_001157761	Phf11c	38.4131	54.08	39.2438	20.3941	14.2048	32.5469
NP_659096	Nrbp2	18.1501	47.3538	38.2751	11.3996	10.6581	0
NP_001288341	Smc2	281	299.5	414	179	110.5	231.5
NP_032043	Smc2	281	299.5	414	179	110.5	231.5
XP_017168555	Plekho2	308.438	301.847	318.529	247.994	111.534	211.62
XP_006522133	Tmem44	3.83177	0	4.82189	8.67298	24.2152	27.0077
XP_006498131	Cntrl	1004.95	1231.43	1359.91	768.634	631.813	964.593
XP_006523863	Uhrf1	40.9364	58.8773	38.2219	31.4273	0	2.3873
XP_006539940	Wdr62	36.8046	88.2871	96.4747	29.5308	13.7325	0
XP_011249035	Kmt2b	191.802	379.051	162.237	15.4551	79.7338	22.7737
XP_006539114	Cfap74	19.2753	22.5002	4.96907	0	0	0
XP_006497884	Surf1	64.6578	99.2465	104.686	151.37	118.205	135.87
XP_006531245	Rbm34	116.246	111.039	93.9449	86.5932	56.1561	79.5712
NP_776101	Maoa	124	128	118	183	161	139
NP_001074813	Stxbp5	426.7	246.491	378.48	161.683	204.854	202.677
NP_034511	H2-Ea-ps	218.761	193.918	261.279	176.513	79.6267	121.012
XP_006532781	Chmp6	82.8926	100.378	74.6615	142.706	104.499	127.002
XP_006524304	Syngap1	0	0	0	5.60401	21.9124	13.243
NP_035764	Traip	55.5721	90	97	47	45	27.4247
NP_789804	Rnf208	18	15	13	25	33	21
XP_006496343	Trak2	65.4525	49.022	66.316	103.397	82.9854	77.7493
XP_006510660	4931406C07Rik	25.4711	12.4906	26.5457	42.9699	44.8629	30.9453
NP_835513	Hist1h3h	882.956	388.664	697.283	162.386	136.742	324.527
NP_035016	Ndufa4	436	343	493	644	537	561
XP_006498513	Ndor1	7.45035	10.7777	11.3	16.2013	15.9513	12.3454
XP_006498514	Ndor1	7.45035	10.7777	11.3	16.2013	15.9513	12.3454
XP_006514934	Morc2a	147.339	192.891	149.475	110.058	116.873	127.423
XP_011242077	Morc2a	147.339	192.891	149.475	110.058	116.873	127.423
NP_001177273	Ccm2	61.6774	58.6702	76.4016	37.8099	42.473	53.8283
NP_081257	Dtwd1	7	8.18586	7.54439	8.82639	8.35592	9.25
XP_006500192	Dtwd1	7	8.18586	7.54439	8.82639	8.35592	9.25
XP_006500193	Dtwd1	7	8.18586	7.54439	8.82639	8.35592	9.25
XP_006500194	Dtwd1	7	8.18586	7.54439	8.82639	8.35592	9.25
NP_001298080	Sema3f	6.68534	0.995514	1.05475	10.2899	7.49658	8.65963
XP_017168717	Sema3f	6.68534	0.995514	1.05475	10.2899	7.49658	8.65963
NP_780598	Trmt10a	10.8333	11.5	9.83333	9.16667	8	6
XP_006500906	Trmt10a	10.8333	11.5	9.83333	9.16667	8	6
XP_006500907	Trmt10a	10.8333	11.5	9.83333	9.16667	8	6
XP_006500909	Trmt10a	10.8333	11.5	9.83333	9.16667	8	6
XP_006500910	Trmt10a	10.8333	11.5	9.83333	9.16667	8	6
XP_011238285	Trmt10a	10.8333	11.5	9.83333	9.16667	8	6
XP_006519955	Gm21451	0	1.311	3.05538	14.4332	12.9182	4.55721
XP_006507208	Plekha1	176.183	123.385	97.6818	220.497	182.24	230.711
NP_598612	Nusap1	137.262	128	224.969	43	44	96.5541
XP_006512768	Tpd52l1	10.551	16.1153	9.73062	24.3279	16.408	22.6989
XP_003688916	Lsmem2	9	6.9649	11	0	3	6
NP_796337	Tarm1	0.00941649	31.8056	2.08e-08	83	39	53.6718
XP_006530209	Cit	49.1679	184.234	116.723	12.792	0.00170738	3.94e-07
XP_017171701	Dis3	50.4554	32.6593	34.1987	0	16.4015	23.5343
NP_001157522	Pik3cd	165.129	106.042	175.917	63.1277	57.7488	102.893
XP_006538713	Pik3cd	165.129	106.042	175.917	63.1277	57.7488	102.893
XP_006529340	Sox13	30.18	0	7.7999	64.4262	42.941	36.684
NP_080271	Fbxo5	116	165	192	78	34	103
NP_001277487	Slc25a25	81.8561	159.825	117.345	246.761	254.954	166.597
XP_006528577	Trmt2b	12.966	43.4045	32.1531	8.55605	0	0
NP_082407	Cenpn	35.5	49.5	61	30	18	27.5
XP_006531450	Cenpn	35.5	49.5	61	30	18	27.5
XP_006507474	Mki67	154.444	239.656	367.52	94.9638	0	79.6283
NP_036180	Omd	2	6	5	1	0.666667	1
XP_006516991	Omd	2	6	5	1	0.666667	1
XP_017171009	Omd	2	6	5	1	0.666667	1
NP_080209	Higd2a	333	298	337	396	349	383
NP_077753	Mtap	205	201	196	260	214	257
NP_001263354	St6galnac4	372.5	264.5	312.5	392	410.5	430
NP_035503	St6galnac4	372.5	264.5	312.5	392	410.5	430
XP_006515192	Atxn7l1	275.023	217.641	202.981	180.181	75.5506	119.814
XP_011241955	Cobl	14.5404	67.1321	0	109.584	162.113	79.6974
NP_109675	Sgpp1	355	321	405	464	428	424
NP_001277327	Cstf2	33.209	56.0116	69.0011	11.0842	29.2959	17.5948
XP_011237621	Acot8	54.0215	27.443	34.6728	10.9998	19.3517	15.0051
XP_017170512	Mbip	16.0305	26.5896	34.4509	11.1525	0	10.7413
NP_780615	Atp6v0d2	52	18.5005	26.1416	65.4918	71.1495	111.999
NP_001165619	Rbm41	16.2169	16.0433	31.452	6.2695	0	8.63918
XP_017170931	Celf2	310.685	295.302	456.106	223.477	205.783	186.505
XP_011242455	Bcl11b	14.4702	29.8952	13.0174	7.10697	0	0
XP_006531279	Mast1	3.63e-06	20.0831	6.6201	49.188	74.072	27.8698
NP_001074928	Sh2b1	88.6805	88.3864	96.3036	74.7195	53.6295	77.354
NP_001276468	Sh2b1	88.6805	88.3864	96.3036	74.7195	53.6295	77.354
NP_001276469	Sh2b1	88.6805	88.3864	96.3036	74.7195	53.6295	77.354
XP_006507550	Sh2b1	88.6805	88.3864	96.3036	74.7195	53.6295	77.354
XP_006519194	Ccdc66	56.8175	13.7916	35.1105	7.85e-06	0	0
NP_065065	Ank	907	756	1209	1609	1368	1291
NP_997150	Tmsb15l	9	19	19.4733	7	5	6
NP_663594	Parp3	69.2781	61.6961	59.9127	129.5	78.5	113.139
XP_006511783	Parp3	69.2781	61.6961	59.9127	129.5	78.5	113.139
NP_700465	Aaas	305	321	307	248	217	288
NP_032739	Nos3	0	0	0	19	32	8
XP_006517237	Slc12a7	13.2607	43.163	20.3011	0	0	0
XP_006498322	Nacc2	7.4533	0	0	23.1628	11.8928	11.3456
XP_006498323	Nacc2	7.4533	0	0	23.1628	11.8928	11.3456
XP_006524674	Spast	84.7502	83.6829	103.482	77.316	50.2328	50.1723
XP_006512082	Slc25a38	12.9894	11.2006	16.021	9.73271	3.54	0
NP_033606	Zp1	5	4	4	12	6	11
XP_006536285	Sirt3	0.462735	4.00725	0	27.9731	16.6699	8.62394
XP_017177829	2610020H08Rik	14.7943	29.9179	21.5244	0	13.3366	0
XP_006528836	Kdm5c	529.646	588.107	324.529	264.001	274.533	176.665
XP_006512928	Bclaf1	233.305	261.639	319.671	202.358	189.913	123.852
XP_017177528	Pira1	45.2183	28.0842	50.5223	123.775	62.3775	99.3065
XP_006538021	Srsf12	9	0	11	19.5664	18.524	14
NP_653109	Fam64a	49.5	34	47	25	12	31
XP_006532039	Fam64a	49.5	34	47	25	12	31
XP_006511024	Tfdp2	10.5578	7.89692	24.153	4.67e-06	0.000141777	0
XP_006507892	Usp35	69.3225	30.4706	56.3717	28.9182	4.05332	0.000159867
XP_011240099	Usp35	69.3225	30.4706	56.3717	28.9182	4.05332	0.000159867
NP_032215	Guca1a	22	11.5	11.5	24	25	26
XP_011244598	Guca1a	22	11.5	11.5	24	25	26
XP_006538419	Ndufaf6	8.72574	10.3688	3.73848	21.8354	15.6738	13.0526
XP_006497630	Cdc123	3.5472	13.2311	7.12805	0	0	0
NP_001239512	Zfp410	36.183	68.0471	70.2523	31.5347	22.0267	24.8367
XP_011242818	Zfp595	21.1564	17.3944	23.4074	13.7685	6.70408	15.0305
NP_032277	Hmgn1	339.5	292	297.5	271.5	252.5	214
NP_056591	Mfap5	1	0	0	15	10	3.71632
XP_011240311	Ifitm10	4.42451	0	0	10.5495	25.4143	11.2282
XP_006541473	C330007P06Rik	31.0568	52.0545	53.2814	29.0114	19.9701	8.38528
NP_001154987	Dctd	1.24446	3.70797	3.25	5.93851	7	4.35699
NP_001154988	Dctd	1.24446	3.70797	3.25	5.93851	7	4.35699
NP_848903	Dctd	1.24446	3.70797	3.25	5.93851	7	4.35699
XP_006509505	Dctd	1.24446	3.70797	3.25	5.93851	7	4.35699
NP_034022	Chil3	497	420	179	1233	639	886
XP_006511398	Ireb2	170.266	223.491	269.777	120.327	46.6502	146.745
NP_032322	Hsf1	131.171	121.806	87.6014	1.18e-08	79.8488	36.5731
XP_006539883	Ppm1n	36	61	22.8886	96	96	62
XP_011240510	Sorbs2	33.3028	39.6586	18.0662	84.398	52.04	55.9793
NP_001036029	Cd27	13.9549	23.2511	10.7036	2.57154	6.24754	5.91965
XP_006519589	Txndc16	13.2759	6.47311	16.9212	18.691	23.3088	24.1467
XP_006511627	Phip	192.384	258.544	269.871	42.1673	58.0117	186.183
XP_017175492	Lrp8	31.0296	40.3069	51.8925	20.1314	23.3452	0
NP_001273314	Slc7a15	20.1565	35.4699	39.9943	18.4598	12.0215	5.11885
XP_006538372	Whrn	35.8262	50.6003	37.2892	22.5301	0	24.3511
NP_001171027	Gng12	19.5714	15.5714	13.4286	31.4286	21.8571	24
NP_001171028	Gng12	19.5714	15.5714	13.4286	31.4286	21.8571	24
NP_001171029	Gng12	19.5714	15.5714	13.4286	31.4286	21.8571	24
NP_001171030	Gng12	19.5714	15.5714	13.4286	31.4286	21.8571	24
NP_001171031	Gng12	19.5714	15.5714	13.4286	31.4286	21.8571	24
NP_079554	Gng12	19.5714	15.5714	13.4286	31.4286	21.8571	24
XP_006505605	Gng12	19.5714	15.5714	13.4286	31.4286	21.8571	24
XP_006524505	Treml2	37.3642	29.4326	50.6078	21.5572	22.6752	8.28994
XP_006516324	Brf1	116.276	157.706	134.313	111.328	61.6667	74.5687
NP_291074	Hist2h4	533.227	298	353	127	99	248
NP_031707	Cenpa	134.651	89.8311	129.58	49.8752	34.2257	88.8373
NP_080141	2310030G06Rik	16	32	14	52	54	32
NP_083075	Tgm5	0	4	0	4	7	7
XP_006538680	Mthfr	144.977	117.666	100.378	88.5663	0	30.5424
NP_059498	Dnal4	47	37.5	32.5	65.5	53.5	50.5
XP_006521233	Dnal4	47	37.5	32.5	65.5	53.5	50.5
NP_001001735	Whsc1l1	231.366	181.628	241.305	139.528	165.934	172.355
NP_001295410	Whsc1l1	231.366	181.628	241.305	139.528	165.934	172.355
XP_006506669	4921507P07Rik	5.90355	5.90179	4.74632	0	0	4.24369
XP_006531549	Il34	0	3.26402	0	8.58283	5.66513	3.81592
XP_006540703	Prmt1	57.2509	26.7694	63.2584	22.4691	15.535	9.07406
NP_082324	Slc25a35	15.5	10.4358	16.5	18.5	22.1731	19.8962
XP_006534336	Slc25a35	15.5	10.4358	16.5	18.5	22.1731	19.8962
NP_056611	Fbxo17	23.5858	37.1599	18.9195	12.726	10.8801	9.50177
XP_006516525	Fam208b	127.097	66.3176	104.119	61.3525	25.6531	5.51e-05
NP_033129	Rrm1	1011	1012	1413	701	598	854
NP_941044	5031414D18Rik	149.373	151.645	176.96	91.9492	66.2854	135.349
XP_011243380	5031414D18Rik	149.373	151.645	176.96	91.9492	66.2854	135.349
XP_017176434	Wdr95	0	2.24031	0	2.23488	4	4.47303
NP_001289304	Zkscan6	76.2721	57.9179	60.1	52.0871	39.0254	28.8394
XP_017170149	Zkscan6	76.2721	57.9179	60.1	52.0871	39.0254	28.8394
XP_006500453	Ddrgk1	15.893	18.3875	20.5042	11.7163	7.02947	14.5531
XP_006500454	Ddrgk1	15.893	18.3875	20.5042	11.7163	7.02947	14.5531
XP_006510925	Pml	74.155	103.284	56.5676	29.3761	37.7722	45.9999
NP_001273110	Lox	2.33333	0	0.333333	4	3	6.66667
NP_001273111	Lox	2.33333	0	0.333333	4	3	6.66667
NP_034858	Lox	2.33333	0	0.333333	4	3	6.66667
NP_001289134	Lmo1	10	6	13	25	14	23
XP_006526363	Wdr33	11.5554	25.2133	30.4048	6.84596	0.00856957	8.50338
NP_536771	Trim69	14	0	0	20	15	21
NP_061363	Snx12	33.3643	51.4283	49.6266	28.5303	27.051	30.2143
XP_011248945	Zfp607	46.695	91.4314	50.51	9.21e-07	34.7297	0.000101323
XP_006532568	Med1	47.8322	53.4343	51.7359	68.3353	55.2351	67.8002
XP_006516056	Ttll5	28.9122	6.23431	22.4946	1.14423	5.45e-08	0
NP_001156390	Ccdc90b	4.10943	0	0	10.3986	5.13705	6.21008
XP_006511429	Ppcdc	102.154	101.953	110.062	88.2358	46.2466	74.174
XP_011241095	Ppcdc	102.154	101.953	110.062	88.2358	46.2466	74.174
XP_017169008	Ppcdc	102.154	101.953	110.062	88.2358	46.2466	74.174
XP_011237708	Stau1	28.6597	23.603	6.86751	69.2	37.8394	47.2562
XP_017173788	Gucy2g	5	6	2	8	8	12
NP_001033699	Dach1	191.011	165.727	301.283	88.1564	45.1172	126.078
XP_017170599	Ttll5	8.19382	16.0355	30.0977	0.826369	0	0
NP_032444	Kcna3	1190	1268	1815	780	456	972
NP_001271125	Srsf10	79.4809	86.5262	45.4211	28.9402	39.9633	33.4056
XP_006516268	Wdr20	81.9448	97.5169	107.892	79.5539	70.0532	61.9876
XP_011237633	Matn4	36.1994	204.206	46.0325	424.69	202.833	428.937
XP_006499514	Xrn2	121.073	188.547	148.325	98.9187	40.3452	93.274
XP_006514869	Rnf215	60.3527	74.2745	70.0191	57.0324	41.2596	53.6881
NP_084322	Dnajc21	285.67	312.27	350.669	265	233	268
NP_062655	Ncs1	9	4	5	14	9	15
XP_011237449	Gapvd1	1.26678	3.48009	6.19138	279.265	96.3009	116.855
XP_017169119	Nmnat3	7.36275	7.35044	0.209983	12.0385	17.1867	11.0525
NP_001276939	Ache	3.95319	0	1	5.32083	9.42849	5.29146
NP_033729	Ache	3.95319	0	1	5.32083	9.42849	5.29146
XP_006530020	Armc9	113.823	103.077	95.7258	91.3162	86.9315	89.4727
NP_001159414	Nsun6	17.7322	16.3751	36	1.43807	5.51792	8.15854
XP_017171308	Cacna1d	275.384	262.103	330.25	238.456	80.8125	88.0986
XP_011243370	Nek4	27.4451	24.143	11.9863	0	8.31178	9.25017
NP_064359	Hacl1	58	72	69	96	84	77
NP_001268969	Pmm1	22.4466	13.0014	5.41246	0	0	0
NP_766264	Samd10	21.7915	27.7526	8.05414	60.8725	34.5304	42.8107
XP_006516285	Gpatch2l	97.053	144.845	173.57	89.662	55.0759	67.6287
NP_780323	Trak1	333.269	304.697	228.183	603.859	446.004	396.364
NP_851840	Cwh43	17.8023	38	16.2953	50.9617	54.6591	38
NP_079607	Gng11	16	32	9	58	88	40
NP_001273649	Tsc2	94.3384	130.211	68.7752	190.972	147.484	146.278
NP_001074017	Usp6nl	127.225	164.48	108.834	224.251	212.101	165.392
XP_006497632	Usp6nl	127.225	164.48	108.834	224.251	212.101	165.392
NP_001177907	Kif17	0	7.1937	0	15.5549	17.1347	7.09046
XP_011238100	1110034G24Rik	19.9309	16.3228	22.5659	16.1328	9.75644	9.28123
NP_032155	Gclm	258	228	310	486	333	395
XP_006504525	Gtf2ird1	0	3.00332	0	7.85009	6.93328	3.02051
XP_006524373	Pkmyt1	301.078	277.679	429.331	182.299	119.44	232
NP_001161380	Ppp1r3e	12	4	6	18	13	24
NP_473438	Pip4k2c	155.906	162.2	120.036	222.725	212.903	171.636
XP_017169257	Pip4k2c	155.906	162.2	120.036	222.725	212.903	171.636
XP_006524135	Wiz	143.214	142.489	97.4906	97.602	44.4674	60.4847
NP_733485	Creg2	30.7139	23.2939	34.0613	21.4946	9.09585	17.4229
XP_017171718	Slmap	66.9845	170.964	205.219	21.8552	0.314648	53.8357
XP_017169989	Vdac1	507.936	530.163	520.96	729.064	570.764	776.43
NP_001171311	Smox	128.625	141.649	143.24	102.208	24.366	86.6512
XP_006506590	Akr1b10	32.762	36.5016	33.9875	53.6861	38.8239	55.7982
XP_006497574	Nudt5	5.85541	15.5646	17.2404	21.9264	51.5809	45.0523
XP_006525225	Eml4	62.6509	52.9503	55.2906	45.2492	7.28552	4.22e-07
XP_017175340	Dcst2	0	0	1.88542	4.20057	17.983	18
NP_032898	Plat	18	34	21	47	73	42
XP_006539868	Pla2g4c	14	33	16	5	0	6
XP_006497977	Sec16a	47.9432	71.0959	27.4162	11.4637	6.52494	19.7464
XP_006524718	Atl2	94.0391	139.927	152.026	74.029	67.7588	89.4652
NP_996825	Ltk	24.0723	23.9625	17.5079	34.84	29.9165	26.8956
XP_017168446	Aspm	46.8659	125.282	124.056	27.8111	26.8883	28.1232
NP_035200	Pfdn2	151.368	125.534	177.508	114.519	66.9742	102.655
XP_006529349	Sp100	96.3363	53.0772	59.1668	10.4582	0	43.4586
XP_006515737	Mbip	30.9125	54.8254	64.2812	31.4829	0	1.2e-07
NP_904336	ND4L	1639	2138	1233	690	1153	612
NP_080836	Cdca8	250	166	270	68	58	169
NP_001300630	Pkp1	45	69	22.5	104.5	112	71
NP_062619	Pkp1	45	69	22.5	104.5	112	71
XP_017170694	Foxn3	29.0852	31.9599	58.2521	80.3432	60.4815	101.13
NP_849217	Ldlrad3	51.2995	32.7683	26.6883	73.8377	51.299	67.4165
XP_011240632	Mvb12a	7.1504	6.15824	14.1449	14.2048	18.4454	20.9941
XP_017171035	Bdp1	540.713	466.607	572.357	248.246	294.735	457.518
XP_006533768	Cpsf4l	2.88e-06	2.19789	3.23078	7.98997	9.11863	3.76493
NP_835505	Hist1h2bj	20.7627	9.05903	21.7105	2.65188	2.58664	8.89289
NP_955021	Jade3	91	115.313	111	59.4815	89	75.999
NP_001033076	Edil3	9	19	6.73098	28.5522	26.5251	18.819
NP_033894	Brca1	235.991	273.427	377.58	105.159	122.534	215.119
NP_932148	Tubgcp3	323.191	307.241	309.985	402.112	347.775	346.022
XP_006524107	Tsc2	101.513	62.0007	99.6156	60.2788	18.3186	40.465
NP_082563	Zufsp	160.82	226.033	267.804	66.135	140.698	130.817
NP_064337	Cnpy2	188	195.5	220	286.5	274	222
XP_006513965	Cnpy2	188	195.5	220	286.5	274	222
NP_031537	Atp7b	4.0601	0	0	4.99996	17.9998	18
NP_001268970	Pmm1	8.95493	4.99587	2.99624	10.3375	10.0511	10.9787
NP_001192292	Clec9a	17.8875	16.352	19.3699	15.0324	4.13263	6.99418
NP_031851	Cyp7b1	1	0	0	5.53988	1.39002	5
XP_006535446	Cyp7b1	1	0	0	5.53988	1.39002	5
XP_006539678	Numbl	0	13.5	8.97579	23.5707	15.5	29.5
XP_006539679	Numbl	0	13.5	8.97579	23.5707	15.5	29.5
NP_001171322	Asph	65.2582	134.126	90.1995	34.5317	53.5077	20.8012
XP_017177714	Tpcn2	12.7587	12.5732	18.4996	0	4.87203	10.2344
NP_001035525	Tacc3	465.512	350.353	551.032	216.304	157.234	343.646
XP_006511794	Slco2a1	28.4363	15.247	16.0494	12.0896	0	0
NP_084253	Polq	160.107	130.856	279.496	0.00263864	40.4979	96.7369
XP_006499485	Ddx27	123.263	196.949	157.947	46.7527	8.86815	115.75
NP_034647	Igfbp4	388	241	465	675	491	620
XP_011249150	Zfp939	3.70833	0	0	5.32356	7.95528	14.3554
XP_006533269	Ikzf3	37.2818	34.6418	48.3753	23.073	12.243	30.3707
XP_006500523	Qser1	186.694	84.1232	140.026	271.613	273.14	191.225
XP_006538600	Eya3	86.1323	90.6716	75.598	65.9023	7.37284	37.5511
NP_001284530	Nfix	29.5837	72.7975	23.5901	120.454	129.282	70.4931
XP_006537963	Pm20d2	0	0	0	5.62936	1.97243	2.09994
NP_001005608	Itgb4	0.0364107	29.2857	52.758	214.948	214.402	67.8262
NP_001093208	Dnajc28	49	55	82	37	11	33
XP_017175442	Eno1	60.0579	44.4632	71.8542	34.4161	36.8443	39.7304
XP_006531115	Lpcat2	31.8109	23.4428	30.3456	0	22.195	0
XP_017175095	Sh2d2a	83.3982	176.265	128.004	54.8244	35.7953	67.6205
XP_017177392	Dhx32	7.85813	9.81022	0	23.4521	56.351	26.3109
NP_001277680	Tmx2	18.4309	4.47311	9.91945	0	0	0
NP_065240	Ddx24	45.5868	112.785	65.0439	139.324	153.746	115.288
XP_006515995	Ddx24	45.5868	112.785	65.0439	139.324	153.746	115.288
XP_006515996	Ddx24	45.5868	112.785	65.0439	139.324	153.746	115.288
NP_035668	Tbx6	45	55	55	44	23	32
NP_001182458	Tpbgl	119	80	114	63	35	76
XP_006517369	Arl10	35.8941	54.6646	53.6719	83.5782	62.0189	69.5207
XP_006512305	Cmtm6	38.9617	32.4592	25.2484	20.3383	11.569	22.7064
NP_065641	Akip1	100.108	84.7476	81.2831	129.594	120.853	100.149
NP_082003	Dym	384.611	360.072	446.376	537.013	443.762	521.907
NP_082080	Usp19	40.3181	55.2721	120.991	161.669	129.511	139.341
NP_904332	ATP8	558	752	375.194	176	350	116
NP_001106960	2019-09-09	132.106	97.5758	163.437	271.797	167.713	267.214
NP_059076	2019-09-09	132.106	97.5758	163.437	271.797	167.713	267.214
XP_006533808	2019-09-09	132.106	97.5758	163.437	271.797	167.713	267.214
XP_006533809	2019-09-09	132.106	97.5758	163.437	271.797	167.713	267.214
NP_803424	Tmem191c	75	71	77	64	34	53
NP_001153838	Ssc4d	9.99999	13	10.5	17.8692	18.5	13
XP_006504400	Ssc4d	9.99999	13	10.5	17.8692	18.5	13
XP_011245367	LOC105246496	137	174	171	136	73	97
NP_598789	Tubg2	14.2381	10.0586	8.096	29.118	23.7923	15.2098
NP_068366	Donson	160.567	166.782	204.44	151.44	119.017	124.869
XP_006523132	Donson	160.567	166.782	204.44	151.44	119.017	124.869
XP_006521213	Ncaph2	20.406	11.1681	19.6617	3.80104	5.47676	11.5297
XP_006507795	Ino80e	23.7615	28.4582	31.6155	13.3603	10.859	23.4983
NP_001297086	Nelfb	173.847	106.941	187.646	93.1532	83.0227	90.2264
XP_006526491	8030462N17Rik	14.4453	10.1666	21.6084	4.14708	8.60053	0.00206349
XP_011240857	Dock6	11.4561	39.3374	17.4124	0	0	0
XP_011238222	LOC105244413	161	164	164	140	102	142
NP_082462	Nkd2	33	56	0	77	106	67
XP_011246501	B3gnt4	40	43	29	22.1561	18	29
NP_598593	Rdh10	108	123	117	213	178	137
XP_011244107	Adcy9	50.6443	72.1088	67.2023	43.7067	45.1609	22.5893
XP_011244108	Adcy9	50.6443	72.1088	67.2023	43.7067	45.1609	22.5893
XP_006505318	Dyrk4	15.8407	15.7451	39.739	0	0	5.51494
NP_001177390	Hilpda	374	378	326	623	465	816
XP_017174676	Metap1d	12.4684	9.93975	12.7052	23.6914	14.1799	21.1363
NP_083597	Ttc32	28.0351	31	33	27.6929	19.845	18
NP_082498	Cdkn3	8.44175	12.4952	13.2466	7.58794	7.38565	3.94766
NP_001136440	BC024139	1	5	4	6	7	7
XP_017171183	Fam81b	7	6	9	11	12	9
XP_006509315	Slc7a2	604.14	653.883	463.8	879.565	750.144	1157.55
NP_080715	Ccdc80	11.2	4.4	9.2	46	22.6	21.8
XP_006522561	Ccdc80	11.2	4.4	9.2	46	22.6	21.8
XP_006522562	Ccdc80	11.2	4.4	9.2	46	22.6	21.8
XP_006522563	Ccdc80	11.2	4.4	9.2	46	22.6	21.8
XP_006522564	Ccdc80	11.2	4.4	9.2	46	22.6	21.8
NP_032233	H2-T24	156.079	145.083	169.758	88.9764	58.4062	135.41
XP_003945388	Gm21596	2151	2200	2787.94	1862.68	1452.77	1857.3
XP_011239549	Zfp638	114.056	172.709	158.827	23.4473	54.6393	113.419
NP_001177250	Clec4n	167.478	101.901	220.596	304.069	228.257	344.472
NP_835490	Hist1h2ak	1031.14	447.862	787.649	140.132	140.228	429.594
XP_006519501	Polr3d	1.96987	44.1108	21.7087	60.2798	48.2785	76.6093
XP_006519125	Rnf31	299.209	353.563	270.197	241.551	117.373	208.778
XP_017177361	Ncstn	108.055	191.455	271.864	100.333	0.00793147	21.7267
NP_666152	Cdca7l	123.161	139.909	163.029	77.5972	116.247	102.974
XP_011248078	Nom1	28.8511	73.6635	93.4833	20.9897	9.01834	10.4829
XP_017174876	Gm10130	42.1087	54.7806	72.9406	34.2434	24.7586	34.835
NP_780468	Shisa4	7.5	11.5	5	14	12.5	13
XP_006530014	Shisa4	7.5	11.5	5	14	12.5	13
NP_665821	Cd3eap	105	80	77	133	104	123
XP_017169314	Mmp11	9.06098	24	18	0.00804217	0	9
XP_006532465	Mnt	59.8963	32.9964	52.4038	29.8069	8.97057	25.1754
XP_006500226	Rprd1b	47.856	79.0221	72.1005	47.8113	32.0576	19.5116
XP_006530965	Edc4	453.559	540.237	556.193	454.28	408.794	398.692
NP_035736	Clec3b	7	1	3	10	7	11
XP_017175884	Zfp618	0	11.5626	0	27.3467	19.3355	11.8718
NP_058062	Cntnap1	111.288	147.516	98.2599	86.5474	66.222	32.5115
NP_001154930	Cbfb	199.58	154.061	201.948	134.033	83.7637	144.163
NP_001157091	Tars2	13.0515	29.8575	39.0881	0	0	12.6569
XP_017174066	Zmym3	40.7801	144.133	80.847	0.0249754	20.3862	2.64e-06
NP_001155895	Arhgap4	83.6621	83.0704	120.284	71.8391	43.3582	53.6279
NP_573490	Nup155	780.475	989.008	1013.52	773.201	610.243	702.162
NP_690038	Usp45	69.8031	73.1449	94.3398	52.9381	59.3546	60.9094
XP_006538424	Usp45	69.8031	73.1449	94.3398	52.9381	59.3546	60.9094
XP_011248434	Usp45	69.8031	73.1449	94.3398	52.9381	59.3546	60.9094
XP_017168543	LOC108167576	115	125	130	89	65	109
XP_017174344	LOC108168644	57.2133	53.5088	46.1374	31.6766	25.0851	45.5736
XP_006523961	Kdm4b	85.1546	40.3783	0.0340895	104.764	106.518	109.899
NP_001074944	Nasp	438.604	409.113	539.533	288.959	249.798	390.706
XP_006498609	Slc12a6	291.626	143.336	247.379	54.6966	59.2504	146.465
XP_006526968	Tjp2	109.344	217.05	158.139	104.71	38.269	37.7565
XP_017174505	Fubp3	0	0	0	33.7245	21.8601	76.8384
NP_001272994	Grk6	7.15981	31.0074	28.2332	5.17634	0	0
NP_075029	Rpl23	4084	3461	3813	4597	4184.47	4303.99
NP_032502	Krt6a	15	9	1	28.6834	110.763	76.9546
XP_006496290	Uxs1	68.4392	34.5845	48.059	90.9847	68.1861	88.549
NP_878259	Tppp	4	4	9	25	16	11
XP_006517472	Tppp	4	4	9	25	16	11
XP_006498882	Kif16b	80.2411	41.9282	90.5719	4.60999	43.1087	17.666
NP_780576	Ston2	59.25	55.5	85.8961	49.5	25.75	30.25
XP_006515436	Ston2	59.25	55.5	85.8961	49.5	25.75	30.25
XP_006515437	Ston2	59.25	55.5	85.8961	49.5	25.75	30.25
XP_011242284	Ston2	59.25	55.5	85.8961	49.5	25.75	30.25
XP_006532683	Ncor1	201.226	268.634	129.469	101.522	40.3524	101.164
XP_006537895	Gba2	32.8365	18.4526	7.26195	0	0	0
NP_031479	Prdx6	804.792	594.884	809.625	1185.56	865.159	1100.91
NP_919323	Sun2	327.609	409.195	252.418	192.699	162.547	237.148
NP_001297551	Fmnl3	1430.41	1287.03	1667.01	1127.38	606.511	1075.38
NP_598661	Psph	27	27.6667	27.3333	24	25	26.6667
XP_006504337	Psph	27	27.6667	27.3333	24	25	26.6667
XP_017176063	Psph	27	27.6667	27.3333	24	25	26.6667
NP_001028500	BC023829	32.0639	44.4557	36.0072	15.7078	15.0447	31.1461
NP_001008424	Cdsn	3	2.5	2.5	16	5.5	10.5
XP_006500949	Ank2	35.5746	28.0813	55.3199	17.6986	21.1005	4.37055
XP_006495767	Gls	309.692	512.302	494.365	311.439	205.488	228.284
NP_067399	Nectin1	418	464	344	869	607	559
NP_001276401	Pitpnm2	74.5	70.8293	48.9504	31.4551	41.723	47.7731
XP_017176233	Pitpnm2	74.5	70.8293	48.9504	31.4551	41.723	47.7731
NP_766204	C330027C09Rik	208.817	404	441	135	127.232	197
XP_006508423	Sytl2	13.8069	71.5342	62.3303	0.0359635	0	5.56577
NP_062729	Plp2	670	579	547	791	679	716
XP_006523402	Park2	1.62143	0	0	2.26366	6.93987	4
XP_006500993	Arnt	206.442	179.912	324.46	134.999	113.259	105.045
NP_077156	Lrrc40	163.426	220.498	239.184	155.865	125.177	148.157
NP_001139358	Tiam1	93.0344	135.505	85.3086	253.554	145.465	190.853
NP_033410	Tiam1	93.0344	135.505	85.3086	253.554	145.465	190.853
XP_006523041	Tiam1	93.0344	135.505	85.3086	253.554	145.465	190.853
XP_006523043	Tiam1	93.0344	135.505	85.3086	253.554	145.465	190.853
XP_006523045	Tiam1	93.0344	135.505	85.3086	253.554	145.465	190.853
XP_011244414	Tiam1	93.0344	135.505	85.3086	253.554	145.465	190.853
XP_017172425	Tiam1	93.0344	135.505	85.3086	253.554	145.465	190.853
NP_032496	Krt16	6.74516	0	0	16.0001	38.0657	14.8369
NP_001161969	Plscr3	129.261	93.353	97.063	148.196	138.535	131
NP_076053	Plscr3	129.261	93.353	97.063	148.196	138.535	131
XP_006534219	Plscr3	129.261	93.353	97.063	148.196	138.535	131
XP_006534220	Plscr3	129.261	93.353	97.063	148.196	138.535	131
NP_598704	Hsd3b7	530	478	517	711	548	673
NP_057870	Ahcy	0	5.77778	0	5.83721	18.4404	14.5363
NP_075632	C1ra	54.1482	40	68	117.141	73	140.607
NP_001165053	Mars	78.3245	204.31	101.241	44.5153	0.000450275	17.5884
XP_011237538	Zfp831	68.8521	124.206	50.2761	33.0141	12.0036	16.324
XP_006529482	R3hdm1	168.394	146.462	183.868	112.472	103.227	8.92692
XP_017175395	R3hdm1	168.394	146.462	183.868	112.472	103.227	8.92692
NP_059101	Lsr	83.3177	88.5999	68.8198	271.644	258.264	113.115
XP_006530397	Git2	39.9182	28.8739	29.0714	53.4529	38.8443	52.9717
XP_006524254	Srsf7	57.0474	92.9032	44.3935	14.4231	37.2427	0
XP_006512944	Trmt11	14.8174	17.6426	28.6888	7.25715	0	11.449
NP_084087	St5	41.644	7.62751	27.0198	92.3423	70.3894	45.4149
NP_001277984	Lgals8	36.6977	23.4787	28.9234	17.8846	14.7885	22.0336
XP_011242622	Lgals8	36.6977	23.4787	28.9234	17.8846	14.7885	22.0336
XP_011242623	Lgals8	36.6977	23.4787	28.9234	17.8846	14.7885	22.0336
NP_062644	Diaph3	181.768	414.455	350.473	62.2601	138	155.869
XP_006525249	Tnxb	0	0	0	50.7504	16.3948	19.321
NP_001106892	Schip1	0	3.6816	14.4847	19	15	24
XP_017170622	Setd3	126.823	317.027	322.966	18.3049	133.74	34.1685
XP_006527180	Cpsf7	39.2976	49.2431	67.009	35.4692	24.2729	10.5505
XP_006527182	Cpsf7	39.2976	49.2431	67.009	35.4692	24.2729	10.5505
XP_017173703	Cpsf7	39.2976	49.2431	67.009	35.4692	24.2729	10.5505
NP_001074245	Gm1123	19	24	27	39	28	34
NP_001074809	Setd2	1125.99	972.846	915.885	867.925	766.365	834.879
NP_001155324	Fbxo44	5.9428	26.0878	22.0184	0	4.41429	0
NP_031520	Ass1	1366	1389	1513	2038	1911	2974
XP_011247401	Tlcd2	1046.51	1395.94	1083.53	971.521	639.486	759.011
NP_780774	Cdv3	191.927	190.357	147.535	54.991	136.181	115.875
XP_017169865	Ncor1	29.3413	12.4083	8.7616	0.228959	1.1e-07	0.544788
NP_001157219	Tmem192	14.1689	10.7897	23.0199	3.98987	5.80387	8.11606
NP_780591	Fam72a	25	36	26	20	16	21
XP_006496973	BC055324	117.396	182.596	161.341	120.144	77.1966	69.3427
NP_031856	Dbi	615.975	686.562	468.066	995.22	944.985	701.362
XP_006505414	Cald1	11.0355	2.46603	4.97277	31.4135	17.3946	52.9409
NP_001239465	Ciz1	135.683	110.432	135.396	64.9146	72.3424	112.16
XP_006498346	Ciz1	135.683	110.432	135.396	64.9146	72.3424	112.16
NP_034851	Lmnb1	2518	2317	2650	1731	970	2091
XP_006506627	Antxr1	10.6527	5.57803	8	26.7445	20.0643	12.2088
NP_083043	Foxp4	207.58	217.531	155.07	243.695	246.433	241.882
NP_789802	Spire1	0	0	14.652	26.5819	27.2402	63.4896
NP_032790	Tnfrsf11b	11	7	2	15	17	30
XP_006533775	Cpsf4l	5.11363	0	0	4.94407	7.8713	7.37195
XP_011243959	Taf2	188.271	209.323	262.582	171.776	160.852	141.364
NP_001070705	BC003331	0	12.6594	0	24.7078	35.0555	12.8585
XP_006504738	Brat1	91.0492	96.353	58.6633	44.6852	29.0852	58.6812
NP_031536	Atp6v1e1	620.5	628.5	718	1076.5	845.5	783
XP_006541257	Fuz	33.9636	25.1109	27.0053	50.1784	55.0266	34.2216
NP_031681	Cd79a	16	32	30	16	10	3
NP_001152957	Mcf2l	38.2212	33.6872	6.88821	100.727	54.3115	60.5084
XP_011245961	Fam3a	14.9836	6.32597	0	39.3471	22.5381	18.9827
NP_033766	Aebp1	117.22	88.7184	94.9748	315.43	238.139	142.58
NP_035187	Pdgfb	486.5	363.5	596.5	326.5	137	290.5
XP_017171991	Pdgfb	486.5	363.5	596.5	326.5	137	290.5
NP_663413	Llgl2	323.204	219.926	193.013	635.837	392.041	401.71
NP_001263300	Whrn	34.9326	41.4218	35.666	18.0356	33.3128	20.3307
XP_011245004	Srrm2	64.5015	1.56e-06	1.42e-07	429.973	114.404	251.059
XP_017175909	Trim14	39.3729	47.6446	34.2681	33.4124	12.7065	9.78001
XP_017175910	Trim14	39.3729	47.6446	34.2681	33.4124	12.7065	9.78001
XP_017176230	Rasal1	17.5174	3.69755	0	28.0181	36.4896	17.0517
NP_001186052	Spc25	13.25	13.75	23.75	6	5.25	10.25
NP_001186053	Spc25	13.25	13.75	23.75	6	5.25	10.25
NP_001292729	Spc25	13.25	13.75	23.75	6	5.25	10.25
XP_006500066	Spc25	13.25	13.75	23.75	6	5.25	10.25
NP_001273592	Ssbp1	21.9998	26.3601	26.4024	14.9544	17.4001	22.2387
NP_001273593	Ssbp1	21.9998	26.3601	26.4024	14.9544	17.4001	22.2387
NP_997633	Ssbp1	21.9998	26.3601	26.4024	14.9544	17.4001	22.2387
XP_006506393	Ssbp1	21.9998	26.3601	26.4024	14.9544	17.4001	22.2387
XP_006520944	Senp1	283.58	242.537	308.941	156.097	91.0542	233.602
NP_598538	Ube2s	976	887	1026	866	692	818
XP_006531580	N4bp1	84.5793	75.621	88.4165	42.1567	41.3788	74.6964
NP_663752	Nup43	80	91	96	76	79	71
XP_006541239	Emc10	23.132	7.73769	12.8794	5.63793	0	0
XP_006507070	C2cd5	38.9163	56.8127	40.8593	34.5584	27.0809	26.3986
XP_011245208	Cep120	409.983	639.013	645.621	406.072	91.2939	267.905
NP_082909	Haus7	148.57	181.265	180.024	148	130.042	106.104
XP_006526972	Tjp2	36.9319	89.9111	135.954	20.3764	8.12904	10.0559
NP_775580	Bmp3	0	0	0	2.99207	10	4
NP_079595	0610009B22Rik	18.6679	15.9707	14.0405	26.0415	27.9012	18.7662
XP_006533980	0610009B22Rik	18.6679	15.9707	14.0405	26.0415	27.9012	18.7662
XP_006533981	0610009B22Rik	18.6679	15.9707	14.0405	26.0415	27.9012	18.7662
XP_006533982	0610009B22Rik	18.6679	15.9707	14.0405	26.0415	27.9012	18.7662
NP_001020563	Bclaf1	34.6937	82.9089	19.1973	265.355	104.985	356.79
NP_001170778	Aldoa	6688.08	4145.61	4342.11	7522.16	6711.47	8685.06
XP_006507272	Aldoa	6688.08	4145.61	4342.11	7522.16	6711.47	8685.06
XP_011240567	Nr2f6	20.5064	26.7143	9.97854	49.4881	33.9752	31.5288
XP_006502199	Atxn7l2	45.2992	28.5632	33.0837	25.8793	11.1944	0
NP_001292560	Cenpi	16.7371	26.7615	36.1009	7.70251	7.12665	16.0154
NP_666036	Cenpi	16.7371	26.7615	36.1009	7.70251	7.12665	16.0154
XP_017173829	Cenpi	16.7371	26.7615	36.1009	7.70251	7.12665	16.0154
XP_017173830	Cenpi	16.7371	26.7615	36.1009	7.70251	7.12665	16.0154
NP_075534	Dpysl5	7.5	5.5	5	17.5	8.5	13
XP_006504108	Dpysl5	7.5	5.5	5	17.5	8.5	13
NP_775576	Haus6	276.96	436.87	367.716	251.882	150.213	241.613
NP_783587	Hist1h4i	378.783	210.555	242.071	146.018	103.582	160.432
NP_033816	Apbb2	54.6643	59.5229	35.4306	37.4297	0.000841089	0.00116904
XP_006535796	Rbm33	218.417	320.9	248.294	189.674	142.174	189.944
XP_017176973	Dennd2a	59.1859	88.9348	89.4027	3.86962	0	61.4581
XP_006515434	Dnal1	0	0	4.41418	10.6503	6.81562	4.65842
NP_001276523	Kynu	55.7626	42.8097	23.2523	15.5176	6.37726	20.274
NP_775562	Mb21d1	113.051	127.307	144.524	69.3291	55.975	111.721
XP_006498683	Bub1	26.4884	15.6462	25.5131	0	0	16.7722
NP_001276844	Cd83	224.413	130.247	176.665	100.29	41.1548	115.772
NP_067304	Rangrf	21.564	5.34732	3.46804	24.5474	38.138	24.3986
NP_032343	Hyal1	90	64	39	106	101	148
XP_006502972	Tal1	27	17	35.9588	15	11	10
XP_006511895	Usp19	137.151	280.553	376.713	500.292	392.277	558.956
XP_006515898	Arid4a	219.701	273.833	102.708	103.659	37.5059	1.66e-05
XP_017176620	Ep400	0	146.757	80.3602	217.035	176.444	177.31
XP_006526332	Arhgap26	171.602	437.639	274.653	0.049781	158.999	3.59e-06
NP_001035883	Cabyr	3.99921	5.25827	5.34711	11.2769	9.18481	6.14066
NP_001035885	Cabyr	3.99921	5.25827	5.34711	11.2769	9.18481	6.14066
NP_081963	Cabyr	3.99921	5.25827	5.34711	11.2769	9.18481	6.14066
XP_017173468	Cabyr	3.99921	5.25827	5.34711	11.2769	9.18481	6.14066
NP_056544	Acox1	875.009	964.839	822.911	1735.73	1440.31	1050.83
NP_077177	Zfp593	144	129	125	157	153	143
NP_001028464	Espnl	17	22	14	37	22	33
NP_001108449	U2surp	332.826	438.102	476.281	293.185	254.165	329.197
XP_006520464	Asap1	0.00122017	0.0851532	0.00131117	92.4691	28.3725	35.58
NP_001028321	Ttc9	22	20	14	36	25	27
NP_067314	Cdon	17.5732	29.011	24.555	52.6927	34.6229	35.7143
XP_006510570	Cdon	17.5732	29.011	24.555	52.6927	34.6229	35.7143
XP_006510571	Cdon	17.5732	29.011	24.555	52.6927	34.6229	35.7143
XP_006510572	Cdon	17.5732	29.011	24.555	52.6927	34.6229	35.7143
XP_006510573	Cdon	17.5732	29.011	24.555	52.6927	34.6229	35.7143
XP_006510574	Cdon	17.5732	29.011	24.555	52.6927	34.6229	35.7143
XP_011240883	Cdon	17.5732	29.011	24.555	52.6927	34.6229	35.7143
XP_006525125	Prr3	13.7636	24.8893	17.9634	9.98806	9.89607	11.4393
NP_001171345	Gps1	624.029	526.957	608.485	895.884	700.94	707.283
NP_035263	Pole2	92.9168	87.5672	78.7821	60.7118	15.7632	61.7735
XP_006514171	Hmha1	755.819	771.951	1096.95	594.766	402.553	621.089
XP_006525030	Tbc1d5	196.838	397.283	425.186	173.13	141.239	146.286
XP_017171434	Tsc22d1	52.3578	74.9496	23.9246	135.64	75.1751	120.565
XP_006530959	Lrrc29	53.1248	52.1297	35.1721	34.9669	27.0902	14.8793
XP_006510325	Usp28	34.1681	111.681	108.936	11.8374	0	33.5265
NP_083644	Tex30	19.3333	26	26	16.9992	13.4982	19.3333
XP_006496377	Tex30	19.3333	26	26	16.9992	13.4982	19.3333
XP_006496378	Tex30	19.3333	26	26	16.9992	13.4982	19.3333
XP_006511148	Dmxl2	13.2898	30.0748	38.245	51.0333	70.6284	43.7018
NP_001038985	Clint1	1430.14	1509.91	1373.34	2253.04	2279.42	1576.41
NP_848027	Tbce	281.262	269.044	354.504	205.209	228.084	95.1716
XP_017177438	Arntl	3.35561	1.19378	4.51037	9.68374	27.4862	13.8783
XP_017177439	Arntl	3.35561	1.19378	4.51037	9.68374	27.4862	13.8783
NP_001153106	Prrc2b	1214.33	1682.21	1373.53	1137.85	1048.32	939.344
XP_006505744	Mbd4	55.876	40.3277	74.1779	36.6916	22.3572	0
XP_017168743	LOC108167614	32	19	20	16	7	10
NP_068677	Hr	156	150	182.5	623	324.5	318
XP_011243268	Hr	156	150	182.5	623	324.5	318
XP_006530237	Slc8b1	74.4065	56.4312	74.138	53.9041	39.4431	53.2797
XP_017173466	Polr2d	15.7038	21.2389	24.2879	12.7542	11.1825	15.5907
NP_001185740	Frem1	0	0	0	2.19999	1.39999	0.399999
XP_006538076	Frem1	0	0	0	2.19999	1.39999	0.399999
XP_006538077	Frem1	0	0	0	2.19999	1.39999	0.399999
XP_006538078	Frem1	0	0	0	2.19999	1.39999	0.399999
XP_011248357	Frem1	0	0	0	2.19999	1.39999	0.399999
NP_081397	Vkorc1l1	54.9369	52.1097	52.1128	91.0927	59.6417	79.2165
NP_780346	Vars2	219.5	223	215.5	210	161.955	174
NP_598781	Tmed4	511	382	392	654	606	499
XP_017168578	Phldb1	341.114	288.953	259.078	399.487	335.82	412.823
NP_083429	Scamp1	426	414.451	499	655	537	525
XP_017170597	Ttll5	31.7352	26.2965	71.14	1.26637	8.1e-06	14.1374
NP_035373	Rarb	9	7.60862	9.69964	50.6954	20	27
XP_006512700	Hace1	8.31305	19.4546	5.27836	0	0	0
NP_001269871	Fancc	8.6574	8.82184	0	12.2418	25.6711	17.0647
NP_660131	Rasgrp4	88.3083	39.2857	57.154	250.405	95.9599	258.662
NP_083249	Lrrc15	11	2	3	24	22	10
NP_034149	Dapk2	98.2062	108.488	105.618	94.4005	60.7486	47.3451
NP_001034440	Nolc1	280.965	237.757	345.192	208.962	218.787	162.595
NP_001073601	Tmpo	107.602	96.6969	39.9079	34.9382	19.5345	25.342
NP_835508	Hist1h2bn	202.424	74.1112	138.079	32.2213	33.4119	58.1049
NP_613061	Gldc	4	10	12	34	16	21
NP_001001737	Zfp950	4.84793	10.7805	8.64943	15.9362	11.6307	13.1295
NP_033572	Trim25	2194	1922	2256	1817	1179	1690
XP_006508835	Arhgef10	4.66105	12.8131	0	13.258	18.0359	16.8758
XP_006534576	Enthd2	11.2587	9.92449	12.4737	12.8162	17.4291	15.049
XP_006534577	Enthd2	11.2587	9.92449	12.4737	12.8162	17.4291	15.049
XP_017170329	Enthd2	11.2587	9.92449	12.4737	12.8162	17.4291	15.049
NP_061343	Gas8	88.2788	76.9159	82.2248	60.3681	26.8711	64.981
NP_075974	Sync	18.5849	13.1025	20.3905	40.4229	24.4245	27.9452
XP_011246104	Fam120c	0	13.9113	0	27.0545	13.2028	20.4739
XP_006513797	Vps26a	109.132	73.8055	116.016	6.84e-05	4.51e-06	77.5448
XP_006510735	Ift46	9.07591	53.9654	57.7545	0	1.27462	0
XP_006533895	Zmynd15	245.905	324.715	293.284	207.174	57.6464	194.077
XP_006528843	Tmem164	61.6323	113.472	83.5623	32.0252	34.7547	59.3257
NP_001192203	Crxos	8	6	5	14	15	8
XP_017176775	Parp11	42.7058	46.6393	27.2482	26.6539	1.41737	16.5641
NP_848134	Klf11	527	547	529	517	436	429
XP_006533892	Zmynd15	89.5912	126.726	149.203	36.6014	23.94	93.8616
NP_001103797	Dmtf1	338.316	395.411	361.636	338.957	275.69	270.74
NP_001277569	Dab2ip	12.0135	20.4103	16.9099	49.4048	79.7674	30.7381
XP_006537615	Kif24	32.9924	71.9186	24.0055	84.4563	75.7648	82.6738
XP_011236904	Pard3b	17.9093	16.1977	19.6239	41.3406	50.2654	23.2361
XP_006540092	Sbsn	19.1927	12.6621	0	39.6848	37.2525	19.5776
NP_033721	Aanat	8.65286	3.40115	13.1504	28.6194	15.4338	18.4125
NP_084257	Adamtsl2	49.5811	42	50	38.3522	30	13
NP_766532	Itgae	343.951	240.323	492.927	212.222	85.5434	154.804
NP_899246	Klhl6	993	1214	1363	872	422	871
XP_006504495	Tbl2	142.214	90.8404	66.3943	12.1169	46.9068	47.9977
NP_038578	Hist1h3a	443.451	227.011	367.546	116.381	74.965	237.602
NP_958793	Plec	1350.89	1106.29	854.029	2588.1	1723.84	1601.38
NP_898986	Rhbdl2	1.2018	1.20095	1.5	4.45742	2.41277	2.35109
XP_006503088	Rhbdl2	1.2018	1.20095	1.5	4.45742	2.41277	2.35109
XP_006515146	Cog5	66.0074	56.3915	52.2568	39.7664	51.4416	34.7728
NP_786926	Plxna4	548	481	979	369	114	211
NP_573471	Zfp287	9.36834	0	0.0278395	23.6006	14.5	9.94163
XP_006532443	Zfp287	9.36834	0	0.0278395	23.6006	14.5	9.94163
NP_079727	Camk2n1	249	158	205	152	130	102
XP_006504855	Trrap	62.3703	35.4368	89.1235	0.333038	32.6708	16.409
NP_057914	Kif21a	61.0675	94.4842	30.1512	205.335	245.194	97.9506
XP_006504844	Trrap	21.2814	11.5684	34.5393	0.0554315	7.14602	6.69152
XP_006504845	Trrap	21.2814	11.5684	34.5393	0.0554315	7.14602	6.69152
XP_006504846	Trrap	21.2814	11.5684	34.5393	0.0554315	7.14602	6.69152
NP_001277932	Astl	5	12	3	20	11	22
NP_766218	Mppe1	75.3428	64.4993	110.958	44.0619	14.2632	53.3424
XP_011248161	Lmntd2	9.27842	11.5002	3.17341	0	3.29629	0
XP_017167808	Lmntd2	9.27842	11.5002	3.17341	0	3.29629	0
NP_114076	Msh4	8	11	12	5	8	2
NP_613071	Ppp1r3f	70	68	60	46	0	40
XP_017170785	I920046F24Rik	12	11	7	15	13	18
NP_001104491	Runx1	67.9042	137.045	107.905	49.0802	16.401	62.8602
XP_011246922	BC021614	40.1046	22.7578	17.285	6.82344	0	13.446
NP_835216	Edrf1	369.779	524.867	492.981	375.514	311.711	253.65
XP_006500019	Fbxo3	99.2629	132.311	183.479	226.157	195.044	306.442
NP_001074775	Ptprz1	16.7123	39.3303	25.4223	6.10944	15.2313	1.49e-05
NP_001116157	Rhbdd1	63.5635	75.8728	68.9485	103.44	78.8127	87.1903
NP_084053	Rhbdd1	63.5635	75.8728	68.9485	103.44	78.8127	87.1903
XP_006496637	Rhbdd1	63.5635	75.8728	68.9485	103.44	78.8127	87.1903
XP_011240598	Tmem161a	17.5623	16.3682	12.3857	4.68867	12.2056	0
NP_783593	Hist2h2ac	53.8698	24.0978	26.0821	15.0504	6.04765	7.01581
XP_006496384	Zfp142	76.0288	22.0943	39.5476	0	12.9598	0
XP_006513127	Adarb1	8.85984	20.0548	17.9028	7.54e-07	3.35e-07	10.2157
XP_011244936	Phf10	63.7013	41.789	64.6293	26.5077	24.5067	44.6463
NP_001073598	Tmpo	737.353	642.54	903.735	517.147	413.701	619.956
XP_011242249	Gm38699	4.48421	10.5936	9.69929	0	4.25247	3.16958
XP_006533036	Adap2	254.526	209.096	334.138	194.88	90.769	153.406
NP_001103746	Itsn1	0	4.82062	6.05187	24.4021	23.1765	7.27319
NP_075691	Ndufa7	71.75	49.5	60.25	86.75	72.25	80.5
NP_001272919	Cdc27	0	0	9.24042	13.0755	15.9689	8.57275
XP_006515695	Six4	8.06682	0	5.99998	28	41.9999	12
XP_017171133	Mctp1	18.46	11.856	32.5877	39.1491	62.9645	37.8237
NP_780440	Whsc1	54.4733	54.3682	77.373	0	22.9498	46.5487
XP_006503723	Whsc1	54.4733	54.3682	77.373	0	22.9498	46.5487
NP_001001979	Megf10	6	6	3	22	12	10
NP_001025159	Fat2	12.3333	16.3333	6	31	42.3333	18.3333
XP_006533385	Fat2	12.3333	16.3333	6	31	42.3333	18.3333
XP_006533386	Fat2	12.3333	16.3333	6	31	42.3333	18.3333
NP_766366	Maob	10	16	10	34	45	18
NP_001155322	Sgk1	300.126	345.029	335.653	496.258	359.044	525.177
XP_006511663	Gm30447	26	40	36	27	18	13
NP_001300642	Sp100	155.174	224.964	141.536	104.167	20.479	107.508
NP_079690	Myo19	30.0867	49.1809	11.8575	74.2448	52.5295	58.8981
XP_011247475	Myo19	30.0867	49.1809	11.8575	74.2448	52.5295	58.8981
NP_035421	Rpl7	7082	6612	7866	9027	7815	8541
NP_001136281	Slc6a8	642.322	756.357	533.541	1081.39	939.866	760.799
XP_006526299	Csnk1g3	141.9	213.978	229.679	106.229	1.00889	124.487
XP_011239339	Bmt2	35.246	19.1602	30.9873	51.3448	36.7511	45.5727
XP_006509879	Gm16486	109.356	98.484	84.9249	83.6591	19.788	34.8687
XP_017170932	Celf2	144.066	149.025	244.577	95.1965	1.12885	98.0188
NP_001025150	Safb2	1101.09	819.946	931.658	773.079	526.664	719.5
NP_783583	Hist4h4	272	143	176	94	79	116
NP_071313	Sv2a	7	17	17	6	2	6
XP_017175577	Stil	37.7023	54.9589	95.7158	0	19.1024	26.7645
XP_006519104	Arhgef40	56.1856	66.0698	75.5364	99.6928	75.1526	91.5837
XP_006519105	Arhgef40	56.1856	66.0698	75.5364	99.6928	75.1526	91.5837
XP_006519108	Arhgef40	56.1856	66.0698	75.5364	99.6928	75.1526	91.5837
XP_017171515	Arhgef40	56.1856	66.0698	75.5364	99.6928	75.1526	91.5837
NP_032853	Pgf	6.02227	42.3394	10.6531	74.0725	94.0062	39.0575
XP_006538520	Phactr4	0	33.8054	0.0058077	51.1499	74.3515	32.5504
NP_705758	Dis3l2	410.886	557.281	544.128	416.743	359.791	352.856
NP_031534	Atp6v1a	615.25	625	735.75	876.25	747	769.75
XP_006521783	Atp6v1a	615.25	625	735.75	876.25	747	769.75
XP_006521784	Atp6v1a	615.25	625	735.75	876.25	747	769.75
XP_011244111	Atp6v1a	615.25	625	735.75	876.25	747	769.75
XP_006520723	Scx	25.4422	12.657	11.1941	4.9265	5.55188	4.77594
XP_006530830	Nrp1	117.481	113.106	101.879	20.1293	16.7717	96.6311
XP_006508064	2610020H08Rik	15.7364	37.8681	30.9037	5.11121	11.7189	14.4082
XP_006517764	Mast4	43.4872	54.4413	48.513	12.9309	40.5986	0
NP_031899	Doc2b	4	1	1	10	16	5
NP_001231865	Gtf2ird1	21.8539	8.91597	10.8975	0.00186413	6.7965	0.583113
XP_017176899	Itpr1	8.89545	32.534	10.7002	93.6616	41.3787	50.5887
NP_080446	Ergic1	333.696	253.009	288.783	397.078	341.813	352.605
NP_001158127	9530053A07Rik	4.0056	5.00626	3.00448	6.00454	6.00434	5.00478
XP_006532452	Galnt10	5.31115	0.000563283	0.196721	35.7313	27.962	7.11984
XP_006532453	Galnt10	5.31115	0.000563283	0.196721	35.7313	27.962	7.11984
XP_006532454	Galnt10	5.31115	0.000563283	0.196721	35.7313	27.962	7.11984
XP_006511337	Gramd2	6	0	0	11.4647	7.36099	6.26579
NP_598837	Abhd4	260.299	189.069	194.347	277.341	278.905	263.055
XP_011240213	Tmem135	22.8589	28.8644	38.1577	41.005	80.2534	59.7345
NP_083458	Rasd2	4	12	4	20	11	24
XP_006502001	Gstcd	37.8424	132.475	68.7059	12.5208	10.4938	7.32386
NP_660132	Prc1	98.7768	111.788	133.736	44.0252	56.1097	98.6589
XP_006534396	Cenpv	17.0207	16.6348	20.6835	32.5698	21.2548	26.777
XP_017171273	Mycbp2	189.601	111.766	98.5671	1.64e-08	57.5045	72.9694
NP_796196	Casc1	17.6727	11.7456	19.5192	2.8515	5.33946	12.6545
NP_056550	Ddb1	4608	4334.97	4742.29	6221.04	5588.17	4887.39
NP_079847	Pam16	38.628	52.1267	31.3516	60.6793	76.1346	53.182
NP_660133	Crebzf	274.5	331.5	239	240	165.5	168.5
XP_006507669	Crebzf	274.5	331.5	239	240	165.5	168.5
XP_011244551	Ehmt2	104.582	100.111	199.575	53.3038	51.9298	56.7553
XP_017170108	Trim65	123.341	80.5118	82.0983	67.7879	56.2557	34.6201
NP_835506	Hist1h2bl	437.771	196.819	368.032	85.8463	49.0233	214.968
NP_001290405	Csnk2b	33.1279	25.8793	39.1984	48.7881	38.6786	50.1078
NP_666064	Tbc1d12	201.627	194.888	242.444	184.242	87.9696	131.412
[truncated: 37,700 more rows]
